# Supplementary material for: The DISC1 Pathway Modulates Expression of Neurodevelopmental, Synaptogenic and Sensory Perception Genes
Source: PLoS One. 2009 Mar 20;4(3):e4906. doi: 10.1371/journal.pone.0004906 (PMC2654149; doi:10.1371/journal.pone.0004906)
Supplement: Table S1 — Table to show the association between cis variants of DISC1 and DISC1 gene expression in the four HapMap populations. P-values in bold are below 0.05. (0.12 MB XLS) [file pone.0004906.s004.xls]

## Sheet: Table S1
Table S1. Table to show the association between cis variants of DISC1 and DISC1 gene expression in the four HapMap populations. P-values in bold are below 0.05.
Marker	HapMap Position (Build 36)	CEU	YRI	CHB	JPT
rs11576167	229721159	0.104596	0.604147	0.159788	0.780585
rs1765794	229723041	0.516573	0.280942	0.773333	0.47992
rs1059595	229724924	0.321372	0.120975	0.746903	0.415788
rs7553772	229725969	np	0.00448754	np	np
rs7554068	229726260	np	0.00447926	np	np
rs981721	229727073	0.104596	0.623946	0.159788	0.775816
rs12060115	229728523	np	0.537137	np	np
rs1630250	229730826	0.0439175	0.957881	0.811715	0.47992
rs1621135	229731376	0.794139	0.116632	0.73626	0.432366
rs6674059	229732612	np	0.00504382	np	np
rs2808579	229733891	0.0690265	0.506007	0.462253	0.43912
rs1655290	229736450	0.819244	0.116632	0.73626	0.375009
rs2185336	229736523	0.434249	np	np	np
rs3767755	229737802	np	np	0.538436	0.225165
rs16854521	229741927	0.908897	0.777491	0.845523	0.726045
rs4614245	229743917	np	0.827964	np	np
rs7533763	229744146	np	0.370098	np	np
rs3767754	229746285	0.119063	0.623946	0.159788	0.494065
rs12066002	229746678	np	0.617757	np	np
rs12064891	229746712	np	0.537137	np	np
rs7519365	229748279	0.908567	0.77039	0.334388	0.535483
rs7556048	229749264	0.104596	0.629042	0.159788	0.495885
rs7528418	229750715	np	0.0328159	np	np
rs17802224	229750870	0.218165	0.268278	0.454526	0.649197
rs16854547	229751297	np	0.208627	0.995735	np
rs6690785	229755038	np	0.704916	np	np
rs12077872	229755383	np	0.00448754	np	np
rs6667975	229758139	0.120984	0.623946	0.159788	0.494065
rs3767753	229758861	0.104596	0.623946	0.159788	0.495885
rs3767752	229759003	np	np	0.538436	0.225165
rs766288	229760311	0.0562961	0.736319	0.000702754	0.114338
rs11589784	229762372	0.20029	0.622172	0.384807	0.843843
rs1982095	229763653	0.0452538	0.575196	0.0045258	0.117373
rs1655285	229766097	0.405369	0.678573	np	np
rs12092643	229766583	np	np	0.498316	0.384748
rs3767751	229767668	0.908567	np	np	0.88682
rs6662926	229769548	0.76888	0.116704	0.634903	0.352564
rs12040246	229771352	5.27137e-06	np	0.668142	0.550361
rs7533573	229774037	0.0452538	0.728108	0.0225068	0.102637
rs1765782	229778112	0.0452538	0.743512	0.038621	0.102637
rs11122309	229778245	0.950703	np	np	np
rs1619386	229783285	0.0240442	0.877318	0.475232	0.597627
rs17802523	229786667	0.669849	np	np	np
rs12066823	229787498	np	0.270105	0.868946	0.282581
rs1655288	229787500	0.0236227	0.839731	0.646936	0.580707
rs3125933	229789268	0.0441531	0.676886	0.508631	0.384209
rs12060205	229789969	0.503591	0.253177	0.204811	0.317033
rs12119606	229790908	0.280267	0.409751	0.0897097	0.862176
rs1612154	229791491	0.107951	0.735366	0.300774	0.306773
rs12058372	229791873	0.908567	0.435981	0.240222	0.72394
rs12024062	229793166	0.299536	0.868439	0.898648	0.423167
rs2275280	229793384	0.908567	0.156593	0.240222	0.72394
rs2275279	229793717	0.908567	0.683012	0.240222	0.72394
rs6655954	229795404	np	0.401839	0.160675	0.588947
rs1765791	229796744	0.0221722	0.641415	0.615884	0.464712
rs12058117	229797316	0.906973	0.508158	0.225551	0.527671
rs16854609	229797883	np	0.822303	np	np
rs1655304	229797966	0.082796	np	0.0140532	0.123539
rs6658979	229798254	0.00255653	0.819837	0.0394489	0.453271
rs1765777	229798365	0.000621139	0.74958	0.0326931	0.776893
rs1765778	229798979	0.0125016	0.0491684	0.0283668	0.00935578
rs1655297	229800310	0.0061924	0.0392699	0.00286257	0.447319
rs1655296	229800418	0.00222571	0.0513648	0.00274297	0.506063
rs1655295	229800624	0.002789	0.0513648	0.00274297	0.497107
rs1765779	229801196	np	0.312825	np	np
rs10864685	229802898	0.00226246	0.627804	0.17569	0.826626
rs9651125	229803236	0.0028815	0.320198	0.00758506	0.704627
rs6656071	229804323	0.00222571	0.328068	0.00681262	0.83379
rs6679985	229804452	0.00222571	0.37547	0.00759839	0.839047
rs6674294	229805008	0.00222571	0.311157	0.00681262	0.83379
rs6683094	229805188	0.00222571	0.514019	0.00681262	0.839047
rs16854631	229807320	0.908567	0.890602	0.882875	0.592423
rs12067681	229808163	np	0.827964	np	np
rs4658879	229809198	0.0432027	0.387495	0.370061	0.878822
rs892356	229813573	0.00369151	0.136379	0.00931073	0.578298
rs16854643	229814430	np	np	0.945073	0.592423
rs4535990	229814758	np	0.907973	np	np
rs1025527	229816468	0.00412188	0.158002	0.00913338	0.578298
rs1025526	229817264	0.0129301	0.0376741	0.00677786	0.577267
rs4658927	229818212	0.133739	0.825671	0.617687	0.684918
rs17746859	229818855	0.85401	np	0.0516472	np
rs9661331	229818929	0.0159622	0.284048	0.120062	0.556919
rs6541275	229819565	0.0123133	0.425431	0.241893	0.947883
rs6541279	229820086	0.0129301	0.173915	0.00881849	0.578298
rs4603118	229821223	0.0163054	0.386009	0.241893	0.940693
rs6541280	229821502	0.00360249	0.0426976	0.00178364	0.577267
rs6656080	229821888	0.0129301	0.402617	0.00767852	0.578298
rs1030711	229822084	0.0129301	0.191934	0.00767852	0.578298
rs1030710	229822892	0.620728	np	np	np
rs9659663	229823683	0.0129301	0.41798	0.00767852	0.577267
rs12086737	229824312	np	0.294505	np	np
rs1865226	229824505	np	np	0.974022	0.997522
rs16854690	229824707	np	0.717602	0.974022	0.997522
rs10746510	229825561	0.281774	0.00688138	0.844584	0.997522
rs3738398	229828963	0.000801134	0.000273265	0.000116026	0.578298
rs823168	229832647	np	0.720833	np	np
rs823167	229833853	0.000784048	0.0104634	0.00178364	0.578298
rs2082552	229834513	0.209045	0.660416	0.3944	0.996907
rs823165	229836069	0.0209605	0.073649	0.00677786	0.578298
rs823163	229837731	0.0191475	0.073649	0.00413426	0.578298
rs823162	229839036	0.819947	np	np	np
rs1560812	229839142	np	0.441016	0.82592	np
rs1094656	229840298	0.0285171	0.34225	0.00204912	0.577267
rs1094655	229840985	0.0331886	0.0817437	0.00526497	0.419428
rs823161	229841640	0.0139122	0.0514583	0.00413426	0.578298
rs823160	229843259	np	np	0.00358276	0.893326
rs980394	229846130	0.0228747	0.42128	0.00413426	0.578298
rs12084975	229846734	0.21256	0.518282	0.15815	np
rs16854723	229855124	np	np	0.256245	0.295455
rs4658933	229857554	0.189515	0.660416	0.3944	0.996907
rs12059656	229859711	np	0.43099	np	np
rs1285729	229860832	0.710232	np	np	0.965125
rs1361519	229865965	0.474424	0.514645	np	np
rs12060910	229866215	0.152755	np	np	np
rs12060020	229867684	np	0.48986	np	np
rs12063758	229867993	np	0.820818	np	np
rs12061894	229869574	np	0.443308	np	np
rs16854730	229870091	np	np	0.877456	0.997522
rs1417585	229870227	0.000407937	0.137208	0.00124292	0.570756
rs17804007	229871213	0.410621	np	0.0516472	np
rs6668739	229871601	np	0.337866	0.82592	np
rs4366301	229872909	0.000478331	0.139296	0.00124292	0.578298
rs11122318	229873475	0.0283734	0.326917	0.0717084	0.990722
rs9651121	229873917	0.35739	0.432622	0.241021	np
rs11122319	229874905	0.000663494	0.170673	0.00124292	0.652188
rs12030517	229875008	0.0283734	0.314245	0.0717084	0.990722
rs16854753	229875334	0.189515	0.660416	0.3944	0.997075
rs17804163	229875338	0.467642	np	np	np
rs6692082	229876020	np	0.444017	0.82592	np
rs17815196	229879005	0.276474	np	0.15815	np
rs12134895	229879146	0.421297	np	0.537749	0.976155
rs16854756	229879331	np	0.76082	np	np
rs6541281	229879757	0.010122	0.299344	7.70773e-05	0.578298
rs4658882	229879828	0.189515	0.660416	0.492353	0.997075
rs12042938	229883465	0.000407937	0.139296	0.00124292	0.578298
rs11122320	229884221	0.58756	0.0752029	np	np
rs1417584	229885673	0.0266242	0.348709	0.00267511	0.807623
rs6659851	229886185	0.276247	0.828378	np	np
rs12034296	229886700	0.0221655	0.423156	0.839574	0.165592
rs16854761	229887204	np	0.376456	np	np
rs12072724	229887666	np	0.639374	np	np
rs10429975	229889984	np	0.213444	0.715785	0.264506
rs10429976	229890013	np	0.407925	0.724088	0.384986
rs10429978	229890285	0.0259183	0.274169	0.791932	0.231216
rs11589082	229891279	0.0307951	0.137146	0.654747	0.837194
rs1977797	229891697	0.0235059	0.443806	0.62219	0.317721
rs12135278	229892040	0.97193	np	np	0.357599
rs1572899	229892113	0.0219929	0.346295	0.791932	0.269157
rs16854779	229893941	0.0190394	0.191617	0.743386	0.357416
rs16854783	229893994	0.0348938	0.201765	0.751404	0.400576
rs7416743	229894664	np	0.593123	0.74385	0.116827
rs16854785	229894699	np	0.722181	0.738161	0.268187
rs1538975	229894995	0.0221085	0.204274	0.753139	0.315212
rs1538974	229895219	0.0190394	0.211263	0.582647	0.100963
rs11583715	229895662	0.0190394	0.306403	0.582647	0.842203
rs3738401	229896918	0.0190394	0.127928	0.582647	0.843639
rs11586191	229898404	0.0190394	0.259664	0.683214	0.380335
rs11585959	229900341	0.122361	0.156834	0.595614	0.842203
rs11585981	229900585	0.111384	0.114282	0.743386	0.745802
rs17748239	229901524	0.034459	0.0654002	0.582647	0.842203
rs11122321	229902233	0.034459	0.278295	0.743386	0.685276
rs11577035	229902564	0.0197972	0.0654002	0.582647	0.843639
rs12040182	229905788	0.149199	0.851634	0.847169	0.909079
rs16854809	229905870	0.111384	0.509028	0.743386	0.675691
rs10429979	229910192	0.0370375	0.0654002	0.709228	0.675691
rs12043433	229910214	0.0264695	0.0654002	0.709228	0.686191
rs11122322	229910585	0.0417773	0.300199	0.743386	0.685276
rs12045144	229910871	0.113176	0.156834	0.743386	0.685276
rs12044355	229910970	0.0370375	0.0654002	0.743386	0.675691
rs4658935	229911421	0.999463	np	np	np
rs12410426	229913044	0.585818	np	0.82592	np
rs11122323	229915556	0.0417773	0.0654002	0.709228	0.675691
rs12045248	229917371	0.0417773	0.0654002	0.743386	0.70263
rs1934909	229917902	0.82741	0.0701196	0.228659	np
rs6667123	229918614	0.0417773	0.258867	0.743386	0.675691
rs6693517	229919067	0.0750863	0.0654002	0.799211	0.676207
rs6696914	229920103	0.0417773	0.0654002	0.722582	0.666127
rs7547963	229921863	np	0.665823	np	np
rs1954175	229922033	0.226672	0.0859394	0.783254	0.730276
rs11122324	229925804	0.0560858	0.377648	0.743386	0.587675
rs12023889	229926137	0.416883	np	0.661442	0.599818
rs1340984	229927002	0.3561	np	np	np
rs6691979	229927305	0.185745	0.0910504	0.283633	0.762648
rs16854832	229927373	np	0.917634	np	np
rs1340982	229928655	0.28128	0.60133	0.417775	0.693331
rs2812380	229928807	np	0.793732	np	np
rs2487453	229929827	0.752348	0.566095	0.4404	0.724537
rs2812385	229930625	0.140398	0.537981	0.186092	0.438877
rs9431985	229931099	0.940041	0.522685	0.142588	0.952074
rs2812388	229931999	0.519861	0.647448	0.214254	0.843873
rs4083969	229933103	0.0234618	np	0.279978	0.488688
rs12029621	229934698	0.632323	0.843547	0.491477	0.814022
rs12070482	229935070	np	0.793411	np	np
rs2812395	229937002	0.585298	0.614303	0.121755	0.11851
rs4658939	229937312	0.819599	0.317253	0.125187	0.217024
rs2812379	229937849	np	0.793411	np	np
rs2793097	229938404	0.585298	0.86166	0.146509	0.116447
rs12027635	229939821	0.565432	np	0.067952	0.639889
rs11122325	229939924	0.595876	0.235537	0.121755	0.116447
rs10864694	229940134	0.642135	0.235537	0.117987	0.116447
rs2793098	229940766	0.236286	0.86166	0.121755	0.116447
rs2793099	229941499	0.613755	0.86166	0.0688046	0.116447
rs4658941	229941823	0.642135	0.380062	0.121755	0.116447
rs6659970	229942456	0.585298	0.886123	0.121755	0.116447
rs12028200	229942866	0.248549	0.500683	0.121755	0.0737004
rs4658883	229943390	0.149987	0.132846	0.318899	0.0915603
rs2793094	229943605	np	0.796531	np	np
rs2793093	229943696	0.673029	0.849844	0.121755	0.11851
rs17816290	229944645	0.264985	0.952286	np	np
rs10495308	229946190	0.248549	0.235537	0.146267	0.11851
rs10495309	229946215	0.248549	0.311408	0.146267	0.116447
rs2793092	229946963	0.236286	0.634072	0.111024	0.116447
rs16854893	229947318	0.521907	0.544153	np	np
rs12066910	229948355	0.162157	0.306519	0.111024	0.11851
rs11580595	229949634	0.0952648	0.36167	0.0979485	0.19496
rs6668920	229950066	0.919377	0.409613	0.437505	0.577042
rs884158	229951395	0.496906	0.544153	np	np
rs10864695	229951840	0.162157	0.43678	0.0818564	0.11851
rs16854903	229953275	0.521907	0.539049	np	np
rs17748992	229959396	0.183662	0.718958	0.537749	0.874996
rs16854911	229959494	0.521907	np	np	np
rs12076286	229959795	0.179544	0.606923	0.053665	0.163608
rs16854914	229959820	0.528387	0.666935	np	np
rs12091717	229960687	0.309407	0.799328	0.298148	0.19127
rs2793091	229961231	0.518368	0.795432	0.340493	0.448184
rs11122329	229962444	np	0.705062	np	np
rs1538979	229963491	0.101473	0.989185	0.324317	0.255197
rs1538978	229963538	0.603095	0.548434	np	0.857012
rs16854928	229963643	np	0.841559	np	np
rs2793090	229963658	np	0.563977	np	np
rs17749164	229963830	0.76091	0.480831	0.153165	0.187313
rs1538977	229963926	0.763775	0.943036	0.36685	0.237058
rs17816686	229964053	0.911586	0.384614	0.716758	0.837513
rs1538976	229964252	0.763911	0.81248	np	0.857012
rs2793086	229966327	0.763911	0.840875	np	0.857012
rs2793085	229966500	0.66369	0.318376	0.295571	0.982733
rs7529706	229966552	0.525038	0.410039	0.0758368	0.849059
rs11122331	229968753	0.20483	0.799569	0.316488	0.572149
rs3738402	229969633	0.384388	0.803691	0.557779	0.29126
rs6663650	229970036	0.20483	0.7151	0.28776	0.597467
rs2793101	229970901	0.039438	0.904119	np	0.857012
rs2492367	229973212	0.0121692	0.665857	0.222786	0.465429
rs16854940	229973470	0.402705	0.803691	0.557779	0.290267
rs2812386	229973726	0.708909	np	np	np
rs7534681	229974970	0.620919	0.385733	0.716758	0.684795
rs17749485	229975136	0.20483	0.784005	0.299173	0.597467
rs12046794	229975378	0.303732	0.80455	0.342136	0.597467
rs12046795	229975392	0.301247	0.80455	0.342136	0.374106
rs2812389	229977634	0.500383	0.937315	0.403943	0.216991
rs12090676	229978198	np	0.00531227	np	np
rs2812390	229978221	0.181635	0.943542	0.100495	0.172489
rs2812391	229978599	0.990777	0.646329	0.175458	0.559368
rs16854954	229979215	0.437277	0.91807	0.32942	0.975917
rs16854957	229979516	0.581061	0.468785	0.377583	0.354413
rs2812392	229980276	0.15642	0.928881	0.105488	0.207923
rs2812393	229980296	0.191795	0.376404	0.403943	0.216991
rs17766087	229984500	0.409127	0.323834	0.377583	0.354413
rs16854960	229984574	0.908567	np	0.363603	0.639907
rs10495310	229985399	0.385777	0.818203	0.94059	0.0404209
rs4658945	229985464	0.760558	0.104233	0.288829	0.374776
rs16854967	229985969	0.47307	0.614994	0.454501	0.860291
rs11122334	229986209	0.38234	0.203631	0.377583	0.354413
rs17817356	229986844	0.190229	0.836871	0.186499	0.301079
rs12754402	229987478	0.268205	0.376757	0.0331327	0.111539
rs11576260	229988824	0.196462	0.689484	0.0043021	0.327508
rs17817463	229988905	0.661775	np	0.454501	0.494104
rs4310431	229989182	0.570585	0.542197	0.377583	0.371861
rs12144056	229989221	0.477654	0.811926	0.268923	0.615087
rs11590192	229989468	0.350362	0.651716	0.0126259	0.293064
rs6672139	229989860	0.445245	0.432535	0.00748085	0.252884
rs9803690	229989968	0.453042	0.568559	0.00920274	0.215916
rs4385690	229990884	0.241076	0.879333	0.00748085	0.262079
rs4325116	229991664	0.290939	0.511415	0.00920274	0.215916
rs4275438	229992447	np	0.934863	np	np
rs4332347	229992690	0.679739	0.210193	np	np
rs16854974	229993523	0.534713	0.161213	0.327704	0.646621
rs2738888	229993677	0.812892	0.772112	0.601083	0.494104
rs9431997	229994003	0.575542	0.132143	0.119487	0.693191
rs12403256	229994217	0.807845	np	np	np
rs12130935	229995177	0.575542	0.519042	0.119487	0.681921
rs1322784	229995558	0.259853	0.103192	0.0201578	0.262079
rs1322783	229995698	0.661775	0.794746	0.524289	0.493801
rs9432000	229995948	0.583167	0.519042	0.128054	0.681921
rs9432002	229996155	0.575542	0.519042	0.119487	0.689234
rs1998406	229996579	0.250414	0.200963	0.0201578	0.262079
rs962724	229997085	np	0.504403	np	np
rs6693574	229997297	np	0.993294	np	np
rs17817721	229998662	0.675752	0.526642	0.524289	0.263201
rs11802094	230000287	0.443644	np	np	np
rs2738887	230000385	0.248368	0.222004	0.0201578	0.252884
rs7514199	230001325	0.243513	0.538906	0.0622539	0.252884
rs6541285	230001779	np	0.355247	np	np
rs2255340	230002773	0.256897	0.538906	0.0201578	0.262079
rs6668663	230003860	np	0.511295	np	np
rs2738864	230004103	0.248368	0.593642	0.0201578	0.252884
rs9432010	230007460	0.58402	0.480624	0.119487	0.652172
rs2738870	230011516	np	np	0.874925	0.63193
rs2738875	230011996	0.000666284	0.0330265	0.49704	0.54693
rs4658949	230014942	0.788289	0.913613	0.457645	0.214223
rs967244	230015269	0.00257892	0.264363	0.403314	0.536835
rs2759346	230015444	0.678677	0.716616	0.382347	0.273778
rs2759345	230015562	0.97906	0.885666	0.457645	0.396645
rs17766890	230015955	0.575939	0.423898	0.41931	0.294567
rs2738877	230016229	0.390152	0.880341	0.45057	0.854059
rs11122342	230020001	0.336436	0.294603	0.498067	0.812059
rs7548597	230020052	0.85092	0.31912	0.492471	0.267819
rs2759341	230020262	0.0003288	0.285322	0.403314	0.533506
rs2738880	230020522	0.4246	0.449958	0.86267	0.316347
rs6672782	230020617	0.498698	0.982714	np	np
rs6675281	230020724	0.778767	0.982714	np	np
rs12133766	230020768	0.792474	0.423898	0.24675	np
rs1535530	230021050	0.440511	0.801237	0.708978	0.996621
rs1535529	230021232	0.303908	0.856856	0.294755	0.860778
rs2295959	230021305	0.400976	0.364265	0.919925	0.567984
rs11588937	230021495	0.811619	0.957292	0.457645	0.197545
rs6699672	230021496	np	0.794756	np	np
rs2759340	230021977	0.386945	0.775447	0.299685	0.280181
rs2759339	230022284	0.447971	0.199933	0.899559	0.52476
rs2759338	230022349	0.447971	0.364265	0.919925	0.55187
rs12135059	230022529	0.769308	0.834113	0.409053	0.580752
rs11122343	230022709	0.125007	0.45065	0.296448	0.956277
rs12143549	230022991	0.769308	0.69683	0.41931	0.580752
rs16855090	230023682	0.447971	0.716445	0.919925	0.55187
rs16855093	230023959	0.447971	0.396583	0.844414	0.55187
rs16855096	230024901	0.447971	0.9217	0.919925	0.55187
rs7528672	230025683	0.769308	0.69683	0.40714	0.580752
rs6674755	230026183	np	0.890602	np	np
rs2759330	230026777	0.313242	0.284567	0.328136	0.979875
rs16855108	230026800	0.76386	np	np	np
rs2759329	230026975	0.178465	0.864858	0.648965	0.972079
rs7532658	230027524	0.354878	np	0.0575571	np
rs16855128	230028325	np	0.279465	np	np
rs16855131	230028863	np	0.279465	np	np
rs1000731	230030114	0.313242	0.268138	0.428189	0.984116
rs16855152	230030209	np	0.634509	np	np
rs1000730	230030224	0.473833	0.338294	0.88462	0.924623
rs6667141	230031254	0.581853	0.674563	0.41931	0.588486
rs11122344	230031661	np	0.769178	np	np
rs12729026	230032588	0.823197	0.251444	0.659704	0.485196
rs6674099	230033485	0.386945	np	0.486499	0.464245
rs11589087	230036900	0.762231	0.761209	0.457645	0.214223
rs12406166	230037241	0.5656	0.93972	0.575497	0.360211
rs12744978	230038154	0.786391	0.700204	0.41931	0.580752
rs12132978	230038608	0.786391	0.776393	0.41931	0.580752
rs11122347	230038649	0.875628	0.929131	0.745567	0.431721
rs7551537	230038840	0.0783036	0.774493	0.46261	0.840031
rs17768115	230039434	0.64951	0.799628	np	0.923229
rs16841582	230040257	0.0783036	0.768785	0.63848	0.688217
rs6700577	230040500	0.000550605	0.0171746	0.888839	0.53835
rs6663190	230040545	0.132182	0.547592	0.63848	0.688217
rs12135837	230040734	0.567679	0.423898	0.41931	0.294567
rs12087793	230041014	0.863103	0.517182	0.722111	0.450338
rs6694216	230041767	np	0.326124	np	np
rs6541288	230043860	np	0.503948	np	np
rs7553510	230043921	np	0.503948	np	np
rs12139080	230044175	0.926546	np	np	np
rs12120638	230045142	0.782472	np	0.211556	0.175895
rs4658954	230045980	0.973919	0.307704	0.729193	0.0660905
rs12058082	230046674	0.828051	0.328169	np	np
rs2146376	230046965	0.230492	0.740942	0.11214	0.298488
rs12731570	230048561	0.138649	0.880785	0.109431	0.293122
rs12735632	230048639	0.123732	0.880785	0.109431	0.282713
rs11588799	230048894	0.96401	0.871814	0.475912	0.401845
rs9432013	230049220	0.683576	0.607286	np	0.929938
rs4658955	230049958	np	np	0.0516472	0.269326
rs12139880	230050383	0.390737	0.92463	0.654546	0.56841
rs12139117	230050446	0.390737	0.999884	0.654546	0.525029
rs17819668	230051029	0.933662	0.597523	0.39004	0.381707
rs11122348	230051140	0.200253	0.880785	0.109431	0.297027
rs16855239	230051264	0.200253	0.880785	0.109431	0.282713
rs12090070	230051472	0.240841	0.897978	np	np
rs4575071	230052154	0.946641	0.307704	0.39004	0.381707
rs4459095	230052203	0.240841	0.466412	np	np
rs6677522	230052256	0.240841	0.955411	np	np
rs16855254	230052287	0.134963	0.272611	np	np
rs6677638	230052351	0.232707	0.955411	np	np
rs12093976	230053156	0.134963	0.258375	np	np
rs9432014	230053752	0.240841	0.955411	np	np
rs11580219	230053772	0.460779	0.946711	0.111786	0.282713
rs11122350	230054149	np	0.764114	np	np
rs4658958	230054516	0.372028	0.779482	0.109431	0.291479
rs12095576	230054753	np	0.643479	np	np
rs12751370	230055037	0.901112	0.425072	0.295766	0.259778
rs9431696	230055317	0.134963	0.0652919	np	np
rs2146375	230055375	0.240841	0.987234	np	0.0353933
rs9431699	230055477	np	0.698722	np	np
rs16855280	230055515	np	0.345498	np	np
rs7512817	230055728	np	0.36618	np	np
rs11588004	230055819	0.898809	0.394583	0.295766	0.215561
rs12140495	230055927	0.200253	0.826674	0.109431	0.282713
rs6676723	230057537	np	0.629266	np	np
rs6676738	230057611	np	0.612462	np	np
rs1079344	230058720	0.898809	0.404357	0.319646	0.252725
rs4546903	230058747	0.200253	0.831047	0.185751	0.282713
rs7536839	230059063	np	0.477293	np	np
rs7544628	230059116	np	0.432322	np	np
rs7536913	230059134	np	0.629266	np	np
rs7544713	230059177	np	0.629266	np	np
rs748583	230059461	0.867844	0.374508	0.295766	0.252725
rs12730369	230060361	0.200253	0.841533	0.109431	0.282713
rs6684303	230060412	np	0.420183	np	np
rs734551	230061056	0.233014	0.297204	0.484171	0.616877
rs7551234	230061472	np	0.249776	np	np
rs7554237	230062207	np	0.122219	np	np
rs7532753	230062500	np	0.122219	np	np
rs7549664	230063332	0.164192	0.362049	0.516169	0.73431
rs7552697	230064183	np	0.229918	np	np
rs12757857	230065486	0.164192	0.297204	0.516169	0.73431
rs7535146	230068539	np	0.7206	np	np
rs3081	230068955	0.481795	np	0.117269	0.286244
rs3082	230069015	0.557622	0.384928	0.271112	0.151349
rs1407601	230070035	0.188329	0.989353	np	np
rs1407600	230070174	0.188329	0.989353	np	np
rs9432017	230070591	0.0908424	0.415815	np	np
rs4658886	230071645	np	0.525458	np	0.0100114
rs4658887	230071655	0.842483	np	np	np
rs4658888	230071750	np	0.745992	np	np
rs6698332	230073582	0.391598	0.915784	np	np
rs9432024	230073842	0.863103	0.951425	0.0874822	0.365508
rs1015101	230074317	0.896362	0.154566	0.647455	0.0111774
rs9432025	230074347	0.828753	0.933708	0.647455	0.0139429
rs9431706	230074383	0.97738	0.953015	0.663138	0.0133351
rs7553949	230074415	0.828753	0.699611	0.647455	0.0109337
rs1475148	230074824	0.00913884	0.254336	0.37951	0.977724
rs6668845	230075170	0.00758587	0.341705	0.37951	0.977724
rs6671423	230075280	0.230432	0.271061	0.408603	0.424491
rs6541289	230075385	0.0109032	0.355781	0.37951	0.869191
rs7523846	230075483	0.00758587	0.31991	0.37951	0.977724
rs7512173	230075529	0.00758587	0.21018	0.37951	0.977724
rs9432028	230075733	0.99539	0.310363	0.113644	0.271994
rs9431708	230076025	0.864833	0.897345	0.647455	0.0139429
rs7418900	230076171	0.00913884	0.432713	0.37951	0.977724
rs999710	230077566	0.896362	0.154566	0.647455	0.0111774
rs7549204	230077793	0.377203	0.877346	0.524571	0.315027
rs4658960	230077832	np	np	0.227832	0.0171781
rs999708	230078214	0.828753	0.941318	0.647455	0.00933748
rs1009587	230078572	0.939398	0.154566	0.647455	0.0139429
rs12067618	230078759	np	0.929939	np	np
rs7521943	230079315	0.00913884	0.328797	0.37951	0.977724
rs7522155	230079526	0.00913884	0.474051	0.37951	0.977724
rs7519741	230079593	0.66669	0.761868	np	np
rs11122355	230079816	0.673089	0.967948	np	np
rs9431711	230080135	0.350502	0.858122	0.506628	0.207045
rs9432040	230080739	0.828753	0.530121	0.406723	0.0139429
rs12746755	230080936	0.705039	np	np	np
rs7535913	230081033	0.99539	0.2464	0.0874822	0.271994
rs9660295	230081456	np	0.97297	np	np
rs2356606	230081663	0.36785	0.861114	0.506628	0.173712
rs7534369	230082857	0.968388	0.2464	0.0874822	0.212978
rs12740724	230083249	0.99539	0.232535	0.100667	0.153582
rs11122357	230083676	0.99539	0.323513	0.0874822	0.271994
rs11122358	230083869	np	0.411837	np	np
rs2181310	230084039	0.673089	0.34154	np	np
rs7535336	230084125	np	0.342335	np	np
rs10864698	230084512	0.00913884	0.576242	0.37951	0.956959
rs17820909	230084608	0.147006	np	0.0516472	0.282915
rs9432042	230084620	np	0.489034	np	np
rs6695678	230084878	np	0.917043	np	np
rs12073702	230086001	np	0.355312	np	np
rs4658889	230086433	0.675042	0.266222	np	np
rs11122362	230086482	0.00758587	0.21018	0.37951	0.974433
rs9431714	230087871	0.914394	0.400109	0.332062	0.420673
rs1322786	230089729	0.673089	np	np	np
rs1322785	230089824	0.66669	0.282182	np	np
rs4658890	230090704	0.907543	0.357543	0.652635	0.613319
rs1040944	230090728	0.673089	np	np	np
rs11805247	230091453	np	0.00454084	np	np
rs4333837	230091797	0.977171	0.073903	0.242167	0.377924
rs12094190	230092756	np	0.424259	np	np
rs12036719	230093526	np	np	0.600571	0.577133
rs9659649	230094131	0.98981	np	0.950083	0.181062
rs9660395	230094139	np	0.424862	np	0.0271952
rs1407599	230094534	0.967782	0.00209404	0.242167	0.382515
rs2759356	230095255	np	0.813985	np	np
rs11122366	230095958	0.11337	0.924188	0.439034	0.851432
rs1772687	230095978	np	0.749784	np	np
rs973607	230096488	0.60788	0.889102	np	np
rs1772686	230097002	0.493605	np	0.973283	0.998476
rs12036931	230097706	0.130207	0.618546	0.397822	0.874661
rs12036218	230097783	0.130207	0.658077	0.50041	0.918905
rs11585831	230098200	0.0207032	np	np	np
rs967433	230098438	0.447946	0.652786	0.840848	0.866078
rs967434	230098775	0.552025	0.367446	0.928398	0.620385
rs821725	230099359	np	0.749784	np	np
rs7514897	230099554	0.120465	0.955527	0.491638	0.91322
rs6541290	230100101	0.11337	0.948278	0.508604	0.878708
rs17770256	230100175	0.292957	np	np	np
rs9431720	230101773	np	np	0.747765	0.0447899
rs17770286	230101807	0.71534	np	np	np
rs821723	230101819	0.66669	0.730615	np	np
rs10864701	230101907	0.11337	0.729754	0.112297	0.888637
rs12139471	230102121	0.950349	np	0.82592	np
rs821722	230102653	0.838815	0.22194	0.296613	0.220792
rs860275	230102768	0.892117	0.316318	0.598722	0.193706
rs11577215	230103529	0.63731	0.91154	0.56562	0.972199
rs12083823	230106199	np	0.575716	np	np
rs7523326	230107253	0.834612	np	np	np
rs6674992	230108961	np	0.0443423	np	np
rs10732686	230114361	np	0.593511	np	np
rs2027457	230116838	0.834612	np	np	np
rs10864702	230117276	0.904645	0.189061	0.159999	0.816546
rs7541019	230117808	0.879137	0.920411	0.0144286	0.229656
rs6541291	230119780	np	0.409751	np	np
rs11122373	230120350	0.905006	0.36579	0.159999	0.812192
rs11122374	230120701	0.905006	0.88079	0.159999	0.238102
rs16855598	230120804	np	0.865615	np	np
rs6687338	230121194	0.905006	0.967215	0.159999	0.812192
rs4658963	230121321	0.857351	0.956291	0.0144286	0.263566
rs2038636	230121872	0.967911	0.526926	0.752133	0.787177
rs821721	230122853	0.431386	0.298253	0.863792	0.166362
rs1028665	230122924	0.775874	np	0.780544	0.267089
rs16855621	230126232	np	0.251578	np	np
rs821717	230126428	0.0962546	0.289166	0.962434	0.139284
rs6695394	230127885	0.0667413	0.361707	0.219765	0.507686
rs7546310	230128443	0.351871	0.250572	0.739726	0.23999
rs6687236	230129853	0.106938	0.0471137	0.972679	0.165731
rs12067117	230130674	np	0.742071	np	np
rs12125581	230132644	0.916066	0.272053	0.992359	0.139192
rs11122376	230132717	0.0995792	0.236303	0.962434	0.165731
rs11584798	230132900	0.0995792	0.236303	0.962434	0.165731
rs928101	230133492	np	np	0.723842	0.291111
rs2356710	230133586	0.0962546	0.236303	0.962434	0.139284
rs821577	230133680	0.334687	0.515724	0.421592	0.0765353
rs12029109	230135065	0.0667413	0.507756	0.132935	0.507686
rs1341555	230135680	0.334687	0.302165	0.440692	0.0765353
rs9431726	230136276	0.559697	0.331033	0.571675	0.0349354
rs821578	230137327	0.950349	np	np	np
rs821579	230138307	np	0.513358	np	np
rs821580	230138443	np	0.70457	np	np
rs4658891	230138779	0.615694	0.24738	0.274475	0.0288596
rs1341556	230138791	0.727861	np	0.82592	np
rs701158	230139751	0.328435	0.178546	0.33451	0.0808141
rs872624	230141523	0.893562	0.237757	0.952024	0.0276146
rs872625	230141596	0.559697	0.457587	0.665145	0.0349354
rs9431730	230143660	0.0281516	0.235463	0.219765	0.400759
rs821581	230143695	0.609096	0.495232	0.737901	0.263202
rs2002626	230143834	0.937368	0.944751	0.47667	0.315566
rs4658966	230145237	0.876137	0.647618	0.848948	0.214045
rs12132281	230145463	0.866886	0.673548	0.908503	0.195725
rs12126719	230145642	0.828588	0.988559	0.916343	0.214045
rs12127507	230145671	0.880106	0.665515	0.914196	0.214045
rs9431732	230145749	0.0737377	0.90152	0.120852	0.51032
rs1094401	230150208	0.479524	0.52232	0.665459	0.269597
rs16855691	230152108	0.506465	np	0.590047	0.0436826
rs16855696	230152492	0.910871	0.277006	0.631387	0.169315
rs12137417	230152776	0.876137	0.168846	0.904652	0.214045
rs9432061	230153317	0.0737377	0.305151	0.120852	0.51032
rs1417866	230153536	0.481494	np	0.637224	0.0781198
rs821585	230154072	0.727861	0.906189	np	0.256577
rs821586	230154816	np	0.878317	np	0.195072
rs16855725	230154855	np	np	0.424631	0.793078
rs12136198	230154938	0.506465	np	0.625275	0.0436826
rs9431735	230155839	0.0667413	0.713791	0.120852	0.507686
rs821588	230156117	np	0.826769	np	np
rs9431736	230156363	0.362931	0.644935	0.5743	0.377971
rs7548491	230156875	0.853481	0.752401	0.205096	0.691296
rs12084523	230156938	0.835162	0.0716221	0.441863	0.846055
rs2772122	230157116	0.771993	0.920974	0.361001	0.411338
rs12084804	230157545	np	0.82142	np	np
rs821589	230157555	0.757773	0.710756	0.328671	0.787681
rs701160	230159104	0.760987	0.133524	0.231139	0.0487575
rs9308480	230159665	np	0.747895	np	np
rs11122381	230160730	0.802039	0.122528	0.324123	0.976155
rs12118242	230160776	0.856603	np	np	np
rs821592	230160882	0.616753	0.375076	0.422188	0.147464
rs2794273	230161352	0.614429	0.0196947	0.170894	0.229633
rs6670775	230163324	0.340134	0.500955	0.025066	0.304321
rs2884006	230165331	np	0.942894	np	np
rs12754734	230165470	0.900807	0.455201	0.324123	np
rs4266866	230165482	0.838953	0.932476	0.0241805	0.330149
rs12566923	230165638	0.502378	0.245699	0.568911	0.527201
rs9651122	230165990	np	0.378716	np	np
rs4658894	230166517	0.866583	0.378834	0.811241	0.740262
rs821596	230168221	0.404976	0.488404	0.286983	0.147464
rs821597	230168887	0.148892	0.734152	0.253004	0.78128
rs821598	230169970	0.381982	0.373605	0.288426	0.439264
rs701161	230170737	0.148892	0.75348	0.241032	0.537424
rs10864706	230173465	np	0.063115	np	np
rs12060283	230173702	0.825671	0.162725	0.811241	0.750522
rs4658970	230174380	0.825671	0.162725	0.811241	0.617429
rs4658971	230174437	0.825671	0.162725	0.811241	0.617429
rs12126582	230174446	0.551108	np	0.0516472	np
rs6690682	230174578	np	0.770976	np	np
rs6690571	230174665	np	0.869564	np	np
rs16855854	230175717	0.866583	0.887408	0.811241	0.617429
rs12066297	230175846	0.866583	0.173695	0.655057	0.739279
rs16855858	230176995	np	0.536244	np	np
rs16855860	230178881	np	0.536244	np	np
rs821600	230183649	0.148892	0.841294	0.341598	0.770211
rs11122384	230185207	np	0.999795	np	np
rs6695158	230185607	np	0.900704	np	np
rs821663	230187845	0.375814	0.276218	0.747692	0.641828
rs821664	230188545	0.207592	0.276218	0.747692	0.641828
rs7546604	230190161	np	0.902646	np	np
rs16855881	230191312	np	0.536244	np	np
rs701162	230191674	0.379118	0.419381	0.721459	0.65115
rs701163	230191732	0.464846	0.624077	0.422994	0.236285
rs12564399	230192495	0.825671	0.70991	0.811241	0.617429
rs16855899	230193161	np	np	0.4204	0.247341
rs821651	230193226	0.363087	0.93009	0.320674	0.158233
rs821652	230193279	0.406059	0.389004	0.459012	0.151381
rs16855913	230193351	0.417736	0.862419	0.941624	0.731579
rs821653	230193510	0.381982	0.521442	0.416194	0.140992
rs16855916	230193611	np	0.398663	np	np
rs12084556	230193694	np	0.95993	np	np
rs16855921	230193718	0.825161	np	0.811241	0.636332
rs821654	230193977	0.235381	0.997724	0.76756	0.218743
rs7536103	230194002	np	0.720223	np	np
rs4658972	230194387	0.866583	0.671786	0.811241	0.617429
rs1341552	230194608	np	0.101752	0.865406	0.39295
rs821655	230194884	0.196429	0.348859	0.666596	0.327041
rs16855938	230195127	0.920801	0.384375	0.612515	0.220622
rs12406771	230195957	0.825671	0.166896	0.811241	0.617429
rs1417863	230196553	0.541868	np	np	np
rs843979	230197231	0.270564	0.354417	0.747692	0.327473
rs11122387	230199056	np	0.770886	np	np
rs12239802	230199529	np	0.536244	np	np
rs2794271	230199809	0.828051	np	np	np
rs11808247	230200433	np	0.679214	np	np
rs821660	230201643	0.464846	0.549394	0.266866	0.147257
rs821661	230201820	0.381982	0.505339	0.419272	0.203524
rs9803630	230202503	np	0.0759433	0.865406	0.793831
rs7537548	230202924	0.108385	0.491127	0.1499	0.0613846
rs7525983	230202938	0.307397	np	0.163047	0.0613846
rs7525995	230202999	np	0.670921	np	np
rs3121910	230203816	0.319773	0.209725	0.178439	0.109189
rs2772120	230203899	0.348326	np	0.262292	0.817185
rs1754607	230203999	0.129143	0.677905	0.253004	0.455848
rs1754606	230204217	0.381982	0.428817	0.270827	0.140992
rs9432088	230204297	0.381982	0.387986	0.266866	0.140992
rs9432089	230205022	0.260086	0.630914	0.175395	0.182819
rs9432090	230205056	0.381982	0.575232	0.416194	0.203524
rs11807173	230205132	np	0.327576	np	np
rs1754604	230205230	0.293546	np	0.198604	0.0993369
rs1754603	230205245	0.417967	0.826093	0.230061	0.459653
rs1772699	230205599	0.403932	0.496154	0.416194	0.203524
rs1772696	230205818	0.321271	np	0.419272	0.140992
rs2806474	230206902	0.607881	np	0.426199	0.168165
rs2772114	230206966	0.288306	0.389838	0.175395	0.306729
rs2806475	230207038	0.298121	0.314106	0.263137	0.37019
rs821602	230208027	0.449056	0.31042	0.419272	0.203524
rs821605	230208559	0.375755	0.440304	0.170365	0.190105
rs860272	230209132	0.381982	0.325223	0.459012	0.140992
rs821615	230210569	0.404976	0.313397	0.416194	0.147257
rs821616	230211221	0.381982	0.313397	0.416194	0.0300283
rs11122391	230211494	np	0.311711	0.865406	0.235086
rs821620	230212308	0.286685	0.412048	0.416194	0.038116
rs821621	230212687	0.409478	0.475631	0.416194	0.0300283
rs821622	230213028	0.454374	0.46089	0.416194	0.0279555
rs821623	230213204	0.408918	0.512954	0.497652	0.0405833
rs866596	230213553	0.381982	0.455363	0.416194	0.0279555
rs821624	230213717	0.235846	0.804173	0.314733	0.441222
rs821626	230213739	0.736063	np	np	np
rs821627	230213791	0.282984	0.837099	0.286205	0.269322
rs16856152	230213833	0.866583	0.916664	0.811241	0.456415
rs821628	230213874	0.381982	0.410854	0.422994	0.232743
rs821629	230214015	0.372352	0.472941	0.375414	0.0684295
rs849349	230214027	0.357017	0.917981	0.0960086	0.657837
rs866055	230214191	0.288306	0.460869	0.16064	0.0694323
rs864752	230214223	0.282984	0.777665	0.295943	0.460062
rs2149736	230214510	0.51962	0.463872	0.802042	0.461157
rs821631	230214758	0.879239	0.786334	0.903265	0.385908
rs11576588	230214819	0.967885	0.186914	0.338635	np
rs16856154	230215058	np	0.054238	np	np
rs821633	230215556	0.839215	0.456736	0.729724	0.317862
rs821634	230216143	0.557762	0.373819	0.586904	0.328491
rs821635	230216164	0.839215	0.212382	0.729724	0.294609
rs821637	230216334	0.888817	0.181201	0.577764	0.231365
rs821638	230216431	0.838372	0.225517	0.729724	0.294609
rs821639	230216466	0.852988	0.225517	0.0804955	0.0482674
rs821640	230216518	0.839215	0.206284	0.729724	0.294609
rs821641	230216601	0.84674	0.225517	0.729724	0.294609
rs821642	230216752	0.839215	0.300611	0.82524	0.294609
rs821643	230216813	0.882066	0.0537883	0.856249	0.245623
rs821644	230216822	0.806491	0.223907	0.577396	0.329526
rs821645	230217114	0.839215	0.225517	0.729724	0.294609
rs16856182	230218289	0.421297	np	0.303242	0.966951
rs821647	230218531	0.396009	0.0783617	0.039717	0.0282699
rs1475515	230219120	np	0.381607	np	np
rs6690221	230219222	np	0.381607	np	np
rs821648	230219654	0.839215	0.967327	0.729724	0.273665
rs7546231	230219848	0.0716929	0.0629366	np	np
rs16856189	230220006	0.825671	0.985872	0.227641	0.943872
rs1341553	230220204	0.928459	0.115769	0.599276	0.0743848
rs1475514	230220416	0.9497	0.835881	0.465707	0.0743848
rs16856199	230220735	0.396246	0.825559	np	np
rs928099	230221459	0.985066	0.420554	0.394483	0.850131
rs11122392	230221474	np	0.115351	np	np
rs16856202	230221774	0.547274	np	0.00877873	0.72414
rs2806458	230222878	0.464989	0.41234	0.453603	0.9752
rs7525200	230223207	0.836394	0.997833	0.429286	0.711806
rs12062781	230223253	0.547274	0.0292866	0.000739011	0.554924
rs7533169	230223389	0.762502	0.191984	0.990392	0.909908
rs11588595	230224139	0.996552	np	np	np
rs3524	230225302	0.488995	0.455617	0.774635	0.791224
rs16856230	230226159	0.547274	0.0528656	0.000739011	0.554924
rs16856236	230226681	0.269802	np	0.000739011	0.648731
rs16856245	230227543	np	0.200354	np	np
rs12088230	230228306	0.682396	0.0297893	0.385034	0.0832063
rs16856254	230228487	0.794608	np	0.649521	0.550483
rs1160491	230228516	0.49807	0.839945	0.03131	0.504637
rs11122393	230230112	np	0.654542	np	np
rs2807578	230230726	0.083205	0.720716	0.0925492	0.0489531
rs2806465	230232917	0.737642	0.918782	0.210743	0.114178
rs9701655	230232941	0.55695	0.218217	0.506861	0.37249
rs9699636	230232955	0.55695	0.617503	0.498456	0.37249
rs9663054	230234827	0.737588	0.661588	0.255364	0.744261
rs9726024	230235123	0.728844	0.616526	0.00830486	0.131553
rs16856295	230235385	np	0.690923	np	np
rs9729194	230235490	0.592533	0.924233	0.25576	0.831111
rs16856303	230236461	np	0.641711	np	np
rs9661550	230237083	np	0.953117	np	np
rs16856305	230238152	0.0822546	0.0825235	0.000820286	0.980064
rs16856308	230238240	0.398692	0.125113	0.0882552	0.517249
rs17773715	230238997	0.48065	0.267305	0.169861	0.0251235
rs9726468	230239004	np	0.553896	np	np
rs3737597	230239461	0.0846691	0.24425	0.0125171	0.721059
rs11578905	230240144	0.625491	0.78354	0.255232	0.818973
rs9729179	230240796	0.214975	0.859401	0.112824	0.693506
rs1411771	230241398	0.234657	0.859401	0.112824	0.691846
rs9661837	230241561	np	0.741462	np	np
rs11122396	230241891	0.0822546	0.410987	0.00181609	0.979914
rs9729647	230242368	np	0.662978	np	np
rs980989	230242818	0.619238	0.513156	0.498456	0.37249
rs9308481	230242929	0.655821	0.642458	0.449614	0.818973
rs11803088	230243392	0.200225	0.661674	0.392083	0.221812
rs16856322	230243610	0.214975	0.455474	0.112824	0.693506
rs1411775	230243925	0.792112	np	0.0549238	0.340483
rs1411776	230244110	0.398692	0.125113	0.171156	0.517249
rs16856330	230244285	0.0822546	0.0825235	0.00553862	0.961614
rs12118641	230244593	0.619238	0.914232	0.498456	0.37249
rs1331056	230245262	0.187619	np	0.0244971	0.141386
rs16856336	230245534	0.0822546	0.0825235	0.00553862	0.961614
rs9661672	230245782	0.331317	0.496874	0.936944	0.820473
rs16856339	230245829	0.0822546	0.0825235	0.00553862	0.961614
rs11122398	230246081	0.0822546	0.410987	0.000670046	0.980064
rs11122399	230246272	np	0.381828	np	np
rs1360399	230246671	0.372063	0.51781	0.936944	0.859454
rs16856342	230246766	0.0822546	0.0825235	0.00553862	0.961614
rs16856346	230246810	0.0822546	0.0825235	0.00553862	0.961614
rs9727641	230246966	0.439725	0.924157	0.972019	0.540213
rs16856349	230247172	0.0822546	0.0825235	0.00553862	0.961614
rs16856351	230247195	0.0822546	0.0825235	0.00553862	0.961614
rs11802446	230247237	0.0983998	0.940477	0.00768309	0.222272
rs16856354	230247628	0.0822546	0.0825235	0.00553862	0.961614
rs12068748	230247646	np	0.266147	np	np
rs16856355	230247689	0.0822546	0.0825235	0.00553862	0.961614
rs12094413	230247787	np	0.00309271	np	np
rs16856357	230247865	0.0822546	0.0825235	0.00553862	0.961614
rs12068973	230248232	np	0.974712	np	np
rs16856363	230248334	0.148711	0.0825235	0.0371343	0.961614
rs16856365	230248348	0.148711	0.0825235	0.0371343	0.961614
rs9308482	230248438	0.261791	0.248775	0.0377038	0.153802
rs12161398	230252318	np	0.662833	np	np
np = not polymorphic in this population
