# Supplementary material for: The DISC1 Pathway Modulates Expression of Neurodevelopmental, Synaptogenic and Sensory Perception Genes
Source: PLoS One. 2009 Mar 20;4(3):e4906. doi: 10.1371/journal.pone.0004906 (PMC2654149; doi:10.1371/journal.pone.0004906)
Supplement: Table S2 — Variants from the DISC1 pathway used in analysis of correlations with global gene expression levels. (0.02 MB XLS) [file pone.0004906.s005.xls]

## Sheet: Table S2
Table S2. Variants from the DISC1 pathway used in analysis of correlations with global gene expression levels
			Model				Minor allele Frequencies
Gene	Variant Type	Variants	Null Allele(s)	Minor Allele	Protective Allele	Risk Allele(s)	Illumina	Affymetrix	Rosetta
DISC1	Risk Modela	rs1538979	*		C	T / C / T	0.1167	0.125	0.125
		rs821577	*		T	G / G / T
		rs821633	*		C	C / C / C
	nsSNP	rs3738401	G	A			0.3	0.275	0.2917
	nsSNP	rs6675281	C	T			0.1417	0.1125	0.1042
	nsSNPB	rs821616	A	T			0.3083	0.3125	0.3333
	‘cis’ SNP	rs1765778	A	G			0.4375	0.3571	0.375
	‘cis’ SNP	rs1655297	T	C			0.4057	0.3243	0.4318
	‘cis’ SNP	rs1025526	T	C			0.3417	0.3	0.2917
	‘cis’ SNP	rs6541280	C	G			0.3833	0.325	0.3125
	‘cis’ SNP	rs3738398	C	G			0.4333	0.3625	0.3958
	‘cis’ SNP	rs823167	G	A			0.3917	0.3375	0.3125
NDE1c	SNP	rs4781678	C	A			0.4917	0.4625	0.4792
	SNP	rs2242549	T	G			0.4828	0.5125	0.5
	SNP	rs881803	T	C			0.3917	0.45	0.4583
	SNP	rs2075512	C	T			0.4667	0.425	0.4583
	Haplotype	rs4781678	*			C	0.3333	0.3875	0.375
		rs2242549	*			G
		rs881803	*			C
		rs2075512	*			C
NDEL1d	SNP	rs17806986	G	C			0.375	0.3875	0.4583
	Haplotype	rs17806986	*			C	0.15	0.1375#	0.1875#
		rs1391768	*			G
		rs1391766	*			C
		rs3817003	*			G
PDE4B	Haplotyped	rs4503327	*		C		0.2917	0.25	0.3333
		rs2503222	*		C
		rs6588186	*		C
	SNPd	rs7412571	C	T			0.45	0.45	0.3333
	SNPe	rs2503177	A	G			0.1583	0.1875	0.1875
	SNPe	rs2503166	A	G			0.3167	0.3375	0.3542
	Haplotypee	rs2503166	*		G		0.0583#	0.0625#	0.0417#
		rs583018	*		G
		rs526772	*		T
PDE4Dd	SNP	rs1120303	G	T			0.1083	0.15	0.1042#
	Haplotype	rs13190249	*			G	0.425	0.425	0.3958
		rs1120303	*			G
		rs921942	*			A
		rs10805515	*			C
		rs10514862	*			A
a [1]
b [2-5]
c [6]
d [7]
e [8]
* All other haplotypic combinations
# Homozygotes for the minor allele were not observed on this platform
1. Hennah W, Thomson P, McQuillin A, Bass N, Loukola A, et al. (2008) DISC1 Association, Heterogeneity and Interplay in Schizophrenia and Bipolar Disorder. Mol Psychiatry: (epub ahead of print).
2. Callicott JH, Straub RE, Pezawas L, Egan MF, Mattay VS, et al. (2005) Variation in DISC1 affects hippocampal structure and function and increases risk for schizophrenia. Proc Natl Acad Sci U S A 102: 8627-8632.
3. Thomson PA, Harris SE, Starr JM, Whalley LJ, Porteous DJ, et al. (2005) Association between genotype at an exonic SNP in DISC1 and normal cognitive aging. Neurosci Lett 389: 41-45.
4. Burdick KE, Hodgkinson CA, Szeszko PR, Lencz T, Ekholm JM, et al. (2005) DISC1 and neurocognitive function in schizophrenia. Neuroreport 16: 1399-1402.
5. Hashimoto R, Numakawa T, Ohnishi T, Kumamaru E, Yagasaki Y, et al. (2006) Impact of the DISC1 Ser704Cys polymorphism on risk for major depression, brain morphology, and ERK signaling. Hum Mol Genet 15: 3024-3033.
6. Hennah W, Tomppo L, Hiekkalinna T, Palo OM, Kilpinen H, et al. (2007) Families with the risk allele of DISC1 reveal a link between schizophrenia and another component of the same molecular pathway, NDE1. Hum Mol Genet 16: 453-462.
7. Text S1 (Tomppo L, Hennah W, Lahermo P, Loukola A, Tuulio-Henriksson A, et al. (2009) Genes of the DISC1 Pathways in the Etiology of Schizophrenia. Biol Psychiatry: (in press))
8. Pickard BS, Thomson PA, Christoforou A, Evans KL, Morris SW, et al. (2007) The PDE4B gene confers sex-specific protection against schizophrenia. Psychiatr Genet 17: 129-133.
