# Supplementary material for: The DISC1 Pathway Modulates Expression of Neurodevelopmental, Synaptogenic and Sensory Perception Genes
Source: PLoS One. 2009 Mar 20;4(3):e4906. doi: 10.1371/journal.pone.0004906 (PMC2654149; doi:10.1371/journal.pone.0004906)
Supplement: Table S3 — Table to show the number of genes significantly altered by each variant and the direction and fold change of effect for each gene. (0.18 MB XLS) [file pone.0004906.s006.xls]

## Sheet: Table S3
Table S3. Table to show the number of genes significantly altered by each variant and the direction and fold change of effect for each gene.
							Illumina					Affymetrix 1st Replicate					Affymetrix 2nd Replicate					Rosetta
Gene	Variant	Variant Type	Number of Genes		Direction	Gene Altered	Variant p-value	Variant Fold Change	Variant*Gender p-value	Male Fold Change	Female Fold Change	Variant p-value	Variant Fold Change	Variant*Gender p-value	Male Fold Change	Female Fold Change	Variant p-value	Variant Fold Change	Variant*Gender p-value	Male Fold Change	Female Fold Change	Variant p-value	Variant Fold Change	Variant*Gender p-value	Male Fold Change	Female Fold Change
DISC1	rs1765778	"cis"	22	7	Decreased	C14orf113	0.615458	1.01034	0.00615927	0.937439	1.10894											0.0443486	1.04103	0.123165	1.00438	1.15253
						C17ORF73	0.038829	1.02204	0.0625464	1.06013	0.984956											0.0173767	1.10755	0.0619355	2.31096	0.712212
						CLOCK	0.123957	1.01353	0.00532873	1.02641	1.01279											0.0469921	1.36505	0.216713	1.68883	1.14028
						FARP1	0.0144836	1.05344	0.00311125	1.22783	0.893866											0.0305999	1.12795	0.0557656	1.39546	0.894213
						SSTR2	0.170003	1.01895	0.0137033	0.984281	1.094											0.0452129	1.07423	0.0910581	1.08059	1.01066
						UQCR	0.045222	1.01302	0.138435	1.06492	0.960879											0.00743154	1.36182	0.0525591	1.52688	1.22106
						ZHX2	0.0200129	1.02343	0.0585076	1.12457	0.924768											0.0465411	1.24675	0.203425	1.29354	1.04674
				15	Increased	ARSJ	0.132252	1.05164	0.0073098	0.958749	1.16076											0.000198996	5.18066	7.89608e-09	7.42042	2.92477
						CSRP2	0.0713861	1.08497	0.0173267	0.661037	1.94075											0.0135921	1.77719	0.0660531	1.75606	2.08583
						EEF2K	0.0353693	1.15227	0.0378858	1.05037	1.27334											0.00307481	1.85327	0.00226538	1.61846	2.18339
						GUCY1A3	0.00448714	1.08225	0.0016983	0.581157	2.09359											0.0219609	1.08931	0.0870374	0.947113	1.15843
						HIST1H4L	0.0106943	1.2112	0.00336079	1.31342	1.13258											0.00839435	1.07964	0.0550627	0.983622	1.24094
						KCNK4	0.0156893	1.03132	0.0870209	1.03275	1.02929											0.0109538	1.77689	0.00937012	2.23098	1.36342
						OCLM	0.0449598	1.06352	0.171107	1.06834	1.06102											0.0394559	1.05107	0.182193	0.944206	1.21637
						PAPD1	0.628142	1.00853	0.0179005	0.992777	0.989122											0.0152156	1.85974	0.0182959	3.08511	0.764863
						PIR	0.0194705	1.26073	0.116423	1.24078	1.29083											0.0432097	1.49215	0.0673391	1.79743	1.28696
						PITPNM1	0.0051277	1.04142	0.0289378	0.997275	1.0851											4.41602e-05	2.90772	1.37386e-05	3.89556	1.87866
						RGS12	0.0248634	1.14012	0.0632303	1.03717	1.26633											0.0468492	1.12945	0.131025	1.2714	0.978977
						TAPBPL	0.16398	1.12546	0.00502468	0.876767	1.50709											0.0359124	1.02917	0.0652088	1.16012	0.956946
						TBCCD1	0.0344183	1.04635	0.118365	0.988545	1.10988											0.039839	1.3409	0.166511	1.8122	0.852372
						TMEM59						0.0115134	1.55454	0.0802707	1.49967	1.61632	0.0323506	1.22676	0.0452427	1.43165	0.976182
						ZCCHC11	0.10816	1.14911	0.0179453	1.18157	1.08042											0.0165353	1.199	0.037504	1.04676	1.51834
DISC1	rs1655297	"cis"	7	3	Decreased	PDLIM1	0.0796348	1.2267	0.0197939	1.1513	1.29054											0.0390944	1.09766	0.0999018	1.32449	0.708109
						PPP2R2B	0.0270122	1.021	0.161513	1.03354	1.00691											0.0262453	1.09165	0.128067	1.075	1.20199
						RETSAT	0.0186023	1.09323	0.081372	1.08698	1.10868											0.0129696	1.25341	0.0988636	1.19222	1.36348
				4	Increased	ARSJ	0.138891	1.04698	0.00551033	0.955052	1.15943											0.00577856	3.88409	0.0123675	4.40344	4.46129
						INCENP	0.018308	1.02572	0.0513311	1.01872	1.03311											0.0420865	1.05897	0.0525757	1.19314	0.737632
						SEPN1	0.0338299	1.31779	0.0277717	0.854128	1.98238											0.0360203	1.07268	0.125113	0.954953	1.38771
						TMEM59						0.00920066	1.55564	0.06004	1.63382	1.48912	0.0945973	1.23479	0.0110116	1.53866	0.942017
DISC1	rs1025526	"cis"	19	11	Decreased	AIM1L	0.00844854	1.00091	0.0495907	0.976778	1.02003											0.03577	1.1464	0.0344318	1.17578	1.11314
						ALKBH4	0.0756036	1.03168	0.0329551	1.09025	0.991201											0.0132537	1.06746	0.0523966	1.37037	1.15865
						ANKZF1	0.0274625	1.17549	0.0698105	1.19518	1.13732											0.0689405	1.06674	0.0134433	1.06705	1.083
						CTAGE5	0.0162628	1.05403	0.067289	1.09087	1.02416											0.0883643	1.05142	0.0109235	1.40002	0.827757
						ELF5	0.0494227	1.01967	0.110948	1.05445	0.989087											0.0270464	1.72219	0.0667059	1.80074	1.5803
						FPR1	0.032503	1.04714	0.0977398	1.08404	1.01466											0.249186	1.10418	0.0436009	0.931538	1.25598
						GIMAP5	0.0419622	1.78261	0.0887807	1.88955	1.79472											0.0387567	1.05409	0.114265	1.29675	1.0193
						HLA-DQA1	0.315417	3.86349	0.0119313	0.3854	30.4289											0.00322622	1.10455	0.00481764	1.32772	1.04574
						PSMC3IP	0.0250324	1.03548	0.147331	1.0278	1.04235											0.308288	1.04122	0.0147473	0.897263	1.1079
						RECQL5	0.0176657	1.08897	0.0908401	1.13294	1.05095											0.0238417	1.28586	0.0307316	1.31438	1.17613
						TUBB3						0.0397741	1.37764	0.169986	1.35409	1.45962	0.00394943	1.19685	0.0537491	1.16445	1.25232
				8	Increased	C16orf5	0.631343	1.12386	0.0269839	0.994441	1.18334											0.010348	1.11857	0.00207755	0.812275	1.20693
						NFATC4	0.364792	1.0499	0.0464921	1.04995	1.06236											0.0321481	1.16554	0.0966282	0.776037	1.14192
						OCLM	0.0270633	1.07305	0.134732	1.07981	1.06949											0.0197101	1.10144	0.0669224	0.779247	1.14582
						PTPRE	0.0468112	1.17938	0.244198	1.24242	1.13233											0.016105	1.05324	0.0656065	0.89098	1.05836
						RAPSN	0.0325181	1.00482	0.112638	0.967102	1.03924											0.245731	1.37868	0.008661	1.12672	1.39102
						TMEM59						0.00557886	1.52016	0.0602213	1.46783	1.57519	0.0702311	1.23529	0.0374735	1.42548	0.996188
						WFS1	0.728233	1.04697	0.00735583	0.877885	1.21762											0.0218723	1.41046	0.0593749	0.942982	1.42439
						ZNF124	0.01674	1.03638	0.0404482	0.96678	1.08961											0.769604	1.00528	0.015634	1.07237	1.00168
DISC1	rs6541280	"cis"	19	9	Decreased	C14orf113	0.754652	1.00693	0.0126423	0.947616	1.08547											0.0446013	1.00571	0.0563326	1.16868	0.982004
						CTAGE5	0.0186121	1.05367	0.0674478	1.09241	1.02094											0.0668394	1.07149	0.0139842	1.40002	0.82203
						ELF5	0.0484805	1.017	0.115042	1.05123	0.985587											0.00732817	1.79042	0.0345868	1.80074	1.7154
						HLA-DQA1	0.299653	3.4413	0.00927151	0.413911	23.2716											0.00282285	1.11807	0.00814998	1.32772	1.06483
						LRP2BP	0.0282862	1.00924	0.167176	1.01475	1.0012											0.0346307	1.23345	0.0641668	1.13579	1.27658
						RANBP10	0.320756	1.04704	0.00788921	1.0482	1.09436											0.0293657	1.47072	0.115837	1.21093	1.49403
						RECQL5	0.0276311	1.09023	0.131186	1.13787	1.04615											0.0185079	1.30401	0.0380536	1.31438	1.19406
						RPL31	0.261669	1.00463	0.0165697	0.951787	1.04906											0.034524	1.15316	0.0751448	1.22739	1.11025
						TUBB3						0.0168628	1.42188	0.0524911	1.42626	1.46626	0.0184675	1.1943	0.17642	1.18162	1.22582
				10	Increased	C16orf5	0.568547	1.14166	0.0456644	1.00179	1.19216											0.0112568	1.10906	0.0060454	0.812275	1.20287
						CD151	0.045453	1.46434	0.152748	1.77423	1.20458											0.0228229	1.4505	0.040647	1.18939	1.43385
						CD52						0.00670506	1.61246	0.00669788	1.39363	1.93652	0.0435105	1.35027	0.170946	1.4353	1.26715
						IRX5	0.117445	1.05428	0.0456577	1.1068	1.00565											0.018084	3.69086	0.0929997	1.16206	3.43012
						MFHAS1	0.0416542	1.34533	0.184025	1.40523	1.32431											0.125829	1.20106	0.046884	0.896872	1.33752
						MGAT4B	0.0208521	1.07044	0.173975	1.06937	1.07167											0.0238746	1.69702	0.11467	0.9003	1.71337
						PRKG2	0.766621	1.01984	0.0307729	1.09152	0.958583											0.0327851	1.23671	0.045385	1.27514	1.26797
						PTPRE	0.0239951	1.19705	0.141175	1.25391	1.15825											0.0236662	1.05349	0.110593	0.89098	1.06028
						TMEM59						0.00436617	1.54963	0.0515744	1.50427	1.5962	0.0507088	1.25722	0.0308124	1.46278	1.00506
						WFS1	0.725575	1.04931	0.00739436	0.881413	1.22258											0.0317458	1.42579	0.105516	0.942982	1.46787
DISC1	rs3738398	"cis"	17	7	Decreased	DYSF	0.013971	1.04495	0.119389	1.04594	1.04404											0.0213253	1.0807	0.0916016	1.0511	1.07131
						FCAR	0.288388	1.00532	0.02653	0.896264	1.11825											0.0464362	1.67236	0.167645	2.06175	1.23687
						FEZ1	0.0396741	1.57287	0.163171	1.62155	1.52428											0.0294918	1.51313	0.0899336	1.48101	1.4941
						GALNS	0.0314805	1.08174	0.0125307	1.15588	0.996742											0.00491961	1.6802	0.0567851	1.63983	1.74977
						PCDHB14	0.01587	1.01958	0.0172394	0.995913	1.03942											0.0495105	1.37679	0.0840245	1.5723	1.11149
						RANBP10	0.475979	1.02371	0.00747615	0.936686	1.09436											0.0291818	1.47573	0.125329	1.47294	1.49403
						SPINK4	0.0344999	1.04815	0.103338	1.08254	1.01062											0.148023	1.60716	0.0273447	1.67255	1.45167
				10	Increased	ARSJ	0.134428	1.04521	0.000841944	0.950676	1.1602											0.0114868	4.67328	0.0344777	5.31558	2.63012
						ATF7IP	0.200855	1.11428	0.048639	1.26807	0.991902											0.0279591	1.3499	0.186343	1.32717	1.38638
						CD151	0.0497369	1.45275	0.134014	1.76216	1.20458											0.000759201	1.39512	0.013174	1.39229	1.43385
						CRTAM	0.061411	1.07339	0.00552061	1.15462	0.982849											0.0065471	1.40292	0.0192741	1.48254	1.20237
						DIP	0.0403964	1.159	0.252227	1.19057	1.12687											0.0472222	1.29726	0.138282	1.26171	1.33867
						F5	0.0582773	1.24195	0.00826249	1.51107	0.992056											0.00365319	1.51798	0.0473146	1.62795	1.35965
						FLJ22662	0.640508	1.02748	0.0385061	0.790139	1.40433											0.00746803	4.59358	0.0761286	4.00018	4.99135
						LCT	0.0439039	1.12127	0.0803124	1.04411	1.21154											0.0116949	1.36018	0.0953444	1.40426	1.28853
						P2RY10	0.166895	1.15373	0.0177844	1.27036	1.07794						0.0297712	1.55748	0.0458976	1.5115	1.62766
						WDR82	0.4876	1.00614	0.0248784	1.11544	0.923993											0.0178256	6.33032	0.0430496	10.4016	1.74293
DISC1	rs823167	"cis"	19	6	Decreased	CTAGE5	0.0165261	1.04378	0.0468282	1.07052	1.02094											0.117744	1.05785	0.0273031	1.33982	0.82203
						GALNS	0.0354056	1.07835	0.00261285	1.19739	0.996742											0.0113901	1.61092	0.0473178	1.65973	1.74977
						LARP6	0.0499208	1.50763	0.0948066	1.70883	1.3658											0.0429976	1.13077	0.0649249	1.18206	1.13186
						PTCH1	0.184262	1.04923	0.0389165	1.19161	0.945844											0.00400331	1.51652	0.00709946	1.68238	1.86964
						SIRT4	0.0167505	1.0965	0.0187407	1.19168	1.0293											0.39472	1.03194	0.0171853	0.985644	0.976496
						SPINK4	0.0160342	1.03935	0.0739897	1.07338	1.01062											0.0174664	1.46218	0.0295821	1.29259	1.45167
				13	Increased	CD151	0.0176327	1.29461	0.0397684	1.54067	1.10816											0.0142931	1.45584	0.0173473	1.20296	1.43385
						CHRNA5	0.374461	1.0542	0.0388064	1.12286	0.954568											0.00211034	1.0196	0.0115323	0.715955	0.998754
						CREBZF	0.00664974	1.23805	0.0397582	1.33035	1.14534											0.224001	2.39847	0.0110238	4.88032	3.31118
						EEF2K	0.0276438	1.31821	0.172131	1.33153	1.28692											0.0138911	2.32199	0.00207924	1.36225	2.37732
						FBXL3	0.0180531	1.13112	0.0247545	1.21053	1.03833											4.56204e-07	7.54638	1.9898e-06	1.36042	8.06847
						MFHAS1	0.021891	1.39489	0.15129	1.49515	1.32431											0.130589	1.19735	0.0473831	0.887739	1.33752
						MGAT4B	0.0230849	1.08386	0.179615	1.09703	1.07167											0.0249563	1.6919	0.116235	0.890824	1.71337
						NLRP3	0.0177127	1.07606	0.0187464	1.1374	1.02278											0.0293714	1.17629	0.0715821	0.774977	1.26695
						P2RY10	0.152231	1.15061	0.0352732	1.17846	1.07794						0.0114445	1.59517	0.0182641	1.58612	1.62766
						PMS2L5	0.0242979	1.13168	0.0875765	1.21341	1.05995											0.0255983	1.17054	0.133732	0.600543	1.19121
						SMA4	0.0402392	1.06832	0.174428	1.1197	1.02714											0.000534657	3.15347	0.00426013	0.853355	3.79774
						UBIAD1	0.0313493	1.21839	0.124039	1.27088	1.1468											0.604473	1.43205	0.047548	2.17984	0.882819
						WFS1	0.558357	1.05069	0.0153903	0.886349	1.22258											0.0340619	1.42189	0.107383	0.934313	1.46787
DISC1	rs3738401	nsSNP	47	16	Decreased	ALDH1A3	0.145392	1.03235	0.0278236	1.0583	1.0188											0.0310998	2.0356	0.132559	1.25311	1.99803
						APOBEC2	0.0241034	1.06683	0.00292361	1.12936	1.0379											0.00763635	1.65942	0.0276249	1.19808	1.65127
						ASB3	0.0453766	1.16649	0.0911061	1.14917	1.17362											0.154835	3.7039	0.0471623	0.969237	3.76515
						CHRNA5	0.683933	1.03612	0.0464767	0.905571	1.16561											0.0346796	1.70078	0.150098	1.30985	1.68924
						FBXL4	0.0499589	1.04119	0.247156	1.00913	1.0519											0.0373586	1.55927	0.14635	1.18972	1.54065
						FZD3	0.190953	1.24142	0.0476174	1.02458	1.45852											0.0236346	2.50024	0.0739421	1.32036	2.39143
						GPR84	0.0363791	1.16568	0.113582	1.25285	1.13634											0.00673341	1.12987	0.0485457	1.31789	1.14121
						KIAA1009	0.00160801	1.10391	0.0274313	1.09905	1.10424											0.423628	1.21941	0.042263	0.69332	1.19526
						MAP3K2	0.238702	1.01097	0.0356847	0.903252	1.09026											0.0341813	1.54675	0.10297	1.21759	1.49886
						MLSTD1	0.742553	1.15752	0.036227	1.99284	0.772338											0.008442	1.78973	0.0319758	1.11435	1.81754
						PIGQ	0.0355867	1.08282	0.203823	1.02817	1.10895											0.0144014	1.36511	0.072049	1.22939	1.32918
						PTGES	0.0305398	1.02169	0.0312859	1.06241	1.0033											0.021564	2.14058	0.0815231	1.15187	2.10933
						TFAP4	0.0696166	1.04763	0.0490405	1.06893	1.02562											0.0432523	1.73591	0.126498	1.18026	1.73546
						TNFAIP8L2	0.0241525	1.33578	0.112195	1.58871	1.21215											0.190612	1.57211	0.0364643	0.999641	1.64957
						TNFSF13B	0.172972	1.35583	0.0150297	2.53284	0.921699											0.0340606	1.16332	0.107935	1.21174	1.13457
						TUBB3						0.037316	1.21588	0.0373482	1.06825	1.30808	0.00580383	1.15662	0.0460701	1.01131	1.27436
				31	Increased	ALDH1A2	0.014304	1.17189	0.0542648	1.06907	1.22598											0.0390006	1.49499	0.102537	1.06618	1.44547
						ALKBH1	0.0299818	1.18684	0.0108768	1.49197	1.04394											0.0393396	1.54662	0.0595352	1.10158	1.49349
						BCAN	0.00348768	1.16823	0.0243911	1.19248	1.17005											0.0248432	1.48371	0.032035	1.08272	1.4069
						BCR	0.217198	1.03032	0.0296187	1.12168	0.994855											0.0129652	1.72168	0.0371611	1.06638	1.59343
						BLZF1	0.656769	1.01505	0.0218575	1.19789	0.876824											0.00268035	1.61014	0.00328897	0.967612	1.45727
						C10ORF164	0.0149904	1.20914	0.0127288	1.46924	1.08199											0.016244	3.2128	0.00589447	1.70438	2.67474
						COL8A1	0.0471555	1.04794	0.0816602	1.00394	1.06424											0.00485853	1.71946	0.022106	1.0364	1.70075
						EPHB6	0.0630629	1.05454	0.0242483	1.14244	1.00885											0.0140929	1.65956	0.0460499	1.09931	1.57452
						FAM60A	0.392167	1.11191	0.0329222	1.03029	1.18453											0.0172029	1.63768	0.0893803	1.04705	1.59078
						GALNT3	0.405712	1.06365	0.015178	1.19137	0.965189											0.0185203	1.73204	0.074289	1.0544	1.66787
						GJA5	0.0418096	1.0443	0.149635	1.0774	1.02464											0.946591	1.0263	0.0268512	1.23004	0.975567
						KIR2DL4	0.0310384	1.0291	0.102762	1.07097	1.00749											0.0203612	1.02016	0.052663	0.875004	0.963476
						LTBP3	0.00861788	1.14753	0.0247487	1.27729	1.07088											0.0158379	1.7945	0.0887932	0.357353	1.78009
						MAFG	0.00348721	1.34745	0.00932405	1.51963	1.25642											0.00998355	1.90091	0.0341094	1.12109	1.81782
						MLF1	0.0410749	1.38412	0.107441	1.31755	1.40998											0.0761183	1.43706	0.035143	1.13641	1.41157
						MSL3L1	0.469513	1.25324	0.00391689	1.01331	1.27577	0.220676	1.29349	0.0247105	1.04628	1.35141	0.430131	1.17102	0.0219124	0.943287	1.17418	0.0422915	1.56146	0.0649957	1.11081	1.50216
						NRBP	0.0075555	1.18705	0.0433929	1.29523	1.1246											0.0135059	1.70957	0.0574727	1.06813	1.65808
						OSGIN1	0.0193024	1.08532	0.0905758	1.08105	1.08862											0.00252416	1.77154	0.00583116	1.11913	1.70237
						PAFAH2	0.558608	1.0423	0.0368143	1.21002	0.935744											0.00347846	1.96146	0.011881	1.10553	1.85696
						PAH	0.0105923	1.2776	0.0968211	1.38948	1.22638											0.040018	1.4465	0.0522227	1.0555	1.39711
						PHEMX	0.0357892	1.20995	0.0678396	0.932626	1.4013											0.0323578	1.01429	0.0601789	0.886362	1.00699
						PPP4R2	0.0680195	1.16345	0.0434394	1.18871	1.12821											0.0374428	1.28264	0.147031	0.843662	1.29105
						RAB11FIP3	0.449607	1.08298	0.00928402	1.43479	0.912832											0.0227108	1.52787	0.0449927	1.06578	1.4752
						RAPGEF2						0.0266102	1.63802	0.128587	1.39604	1.95564	0.00214316	1.45923	0.0355827	1.46008	1.48578
						SLC23A1	0.0592645	1.14316	0.0277291	1.08074	1.15601											0.017912	1.2307	0.0989748	0.874908	1.21653
						TACR1	0.0187369	1.00863	0.0650087	0.990639	1.00853											0.00516786	1.88116	0.0159396	1.1714	1.74981
						TADA3L	0.0885603	1.0247	0.0211834	1.2444	0.928555											0.0367117	1.5749	0.0838289	1.08214	1.4944
						TOLLIP	0.0163233	1.17523	0.0116207	1.40548	1.0567											0.0210109	1.01713	0.0920103	0.849543	1.00376
						TUBD1	0.264122	1.03569	0.0298211	1.11441	0.987775											0.0252618	1.69962	0.0608314	1.12703	1.66719
						ZIC1	0.16961	1.04357	0.0373189	1.12657	1.00434											0.0355495	1.4674	0.0542345	1.0544	1.41682
						ZNF213	0.967199	1.00247	0.00504815	1.26512	0.870461											0.0156955	1.76718	0.0265201	1.13213	1.75589
DISC1	rs6675281	nsSNP	19	2	Decreased	COPS2						0.014179	1.21021	0.0416827	1.14573	1.37116	0.032168	1.1788	0.026012	1.05029	1.36755
						FAM117A						0.0298165	1.30056	0.103079	1.25236	1.42783	0.0241925	1.15618	0.136372	1.13234	1.23017
				17	Increased	AIF1	0.0206531	3.20216	0.0976781	3.1537	1.03061											0.029246	1.47137	0.201279	1.57958	1.35835
						BLZF1	0.465906	1.30547	0.0105736	1.52286	0.905615											0.00570159	1.37537	0.0127835	1.25725	1.57356
						DYNLL1	0.10748	1.47062	0.0429593	1.57397	1.01599											0.0442411	1.28492	0.203685	1.26403	1.35145
						FZD2	0.0370754	1.63472	0.0263428	1.70901	0.862721											0.0390133	1.28928	0.251249	1.37036	1.22692
						GCNT1	0.0179988	3.77434	0.0457265	3.82761	0.807778											0.583557	1.0239	0.0469528	0.859505	1.25499
						GGCX	0.522128	1.06873	0.0424541	1.111	0.942649											0.0429224	1.09457	0.087972	1.19753	0.962023
						GPR176	0.591899	1.01722	0.00746185	1.00638	1.06306											0.0351649	1.24317	0.0990793	1.28189	1.1636
						LGALS4	0.106437	1.01208	0.0424421	1.02763	0.986145											0.0114389	1.53229	0.0692488	1.846	1.28938
						MN1	0.0198693	1.15076	0.0995716	1.1596	0.988833											0.198001	1.07376	0.0496465	1.126	0.965335
						SACM1L	0.120986	1.50785	0.043666	1.64839	0.929064											0.0358464	1.27802	0.162465	1.22485	1.36879
						SLC41A3	0.0433416	1.48401	0.132085	1.52301	1.00437											0.0251048	1.5245	0.00803576	1.97143	0.849406
						TFAP2C	0.606569	1.08075	0.0129631	1.1275	1.01039											0.0394593	1.29851	0.0768191	1.46735	1.03407
						TIMM8A	0.0263302	1.68257	0.081617	1.74632	1.00102											0.0660363	1.17885	0.000718008	1.01098	1.45149
						TMOD4	0.00480661	1.18538	0.0262701	1.18983	0.984253											0.127261	1.18867	0.00527926	1.67494	0.637095
						TUBGCP4	0.420647	1.37974	0.0324812	1.57601	0.929689											0.010131	1.46318	0.0295418	1.38797	1.63193
						UBE2L3	0.0430281	1.55486	0.178519	1.56236	0.980466											0.136377	1.08078	0.020746	0.967275	1.26127
						VCY	0.000853476	1.59026	0.00231622	1.63435	1.01936											0.0408762	1.36461	0.233213	1.56466	1.1611
DISC1	rs821616	nsSNP	18	8	Decreased	ARL15	0.179291	1.02671	0.0221633	0.912838	1.1357											0.0314612	1.25288	0.0806238	1.04462	4.38499
						CARKL	0.0387064	1.22778	0.190365	1.18391	1.24855											0.573518	1.21457	0.0246192	0.974249	1.47435
						CHRNA5	0.692625	1.08759	0.0278294	0.984566	1.21809											0.0402046	1.3611	0.18136	1.34636	1.28243
						EIF2S3	0.921802	1.01257	0.0160492	1.08713	0.991112											0.00408189	1.31873	0.0210145	1.36919	1.23044
						NGFRAP1	0.742914	1.31264	0.0310115	4.23844	0.550259											0.0356121	1.09213	0.0873735	1.04187	1.32752
						SERPINI1	0.0116441	1.07101	0.0635162	1.0963	1.03385											0.936832	1.10026	0.0404414	1.00981	1.18587
						TGFBR1	0.0137693	1.08536	0.0730198	1.07567	1.0894											0.0391085	1.80799	0.0700466	2.04552	1.25352
						ZNF266	0.0110584	1.21208	0.00023844	0.913148	1.51951											0.247662	1.66321	0.0265369	1.1629	2.56028
				10	Increased	CAMK4	0.0304034	1.02377	0.188113	1.04672	1.00589											0.0313693	1.66981	0.075586	1.81316	1.12727
						MGST1	0.0318112	1.18301	0.185115	1.16414	1.20324											0.035544	1.43542	0.159485	1.35868	0.564598
						P38IP	0.0130474	1.15175	0.0964404	1.15311	1.1588											0.0189776	1.20947	0.0848458	1.1188	0.593995
						PRSS21	0.0404946	1.34035	0.180114	1.18079	1.47713											0.0481775	1.15458	0.113748	1.15267	0.92818
						PTGER4	0.0302668	1.02	0.0533805	1.06394	0.980163											0.0346573	3.46139	0.142982	2.96108	2.19127
						RAB11B	0.0488168	1.03466	0.175724	1.02252	1.03608											0.0116792	1.31654	0.0669786	1.34472	0.745776
						S100P	0.0324153	1.07946	0.123797	1.11029	1.05962											0.0395568	1.13627	0.106055	1.16491	0.848032
						SGCD	0.0356538	1.06529	0.0170827	1.04511	1.0845											0.145686	1.16811	0.0263923	1.29922	0.772009
						TSNAXIP1	0.0473497	1.04995	0.0481916	1.00703	1.07841											0.000268179	1.14689	0.00186329	1.16334	0.846116
						VISA	0.286926	1.01988	0.0124746	1.04651	0.980655											0.0159658	1.35749	0.0459823	1.3831	1.02727
DISC1	Risk Model	Associated	22	1	Decreased	EIF1						0.0114667	1.37725	0.0323212	1.4654	1.1795	0.000646291	1.32002	0.00714496	1.20037	1.43794
				21	Increased	AKR1C1	0.0408683	1.30428	0.0667255	1.7386	1.03304											0.0334875	1.31492	0.010717	0.955508	1.6249
						ASF1B	0.00247566	1.00184	0.0155336	0.842353	1.14481											0.0167729	1.2641	0.0114269	1.16996	1.29929
						CD33	0.00701659	1.05048	0.0300323	1.2868	0.886663											0.109095	1.13941	0.0321027	0.800595	1.45547
						CHMP1A						0.0197102	1.35357	0.0933883	1.45287	1.21208	0.0325191	1.30668	0.073241	1.27104	1.39062
						CLU	0.0331872	1.14538	0.000176379	1.0811	1.20021											0.0349342	1.18774	0.0643033	1.49687	1.03572
						CPD	0.798974	1.10113	0.030014	1.13175	1.07086											0.0452758	1.06275	0.0940986	1.09648	1.04257
						EEF1E1	0.00799491	1.07452	0.0510857	0.862849	1.27307	0.0396473	1.30496	0.182564	1.35108	1.24429	0.0200327	1.31506	0.177337	1.47255	1.17285	0.174798	1.08136	0.035847	0.926382	1.18127
						FYB	0.0374587	1.15256	0.006698	1.40381	0.977796											0.108385	1.06772	0.0414534	0.942363	1.15929
						GNL2						0.0242047	1.27426	0.124615	1.24359	1.34397	0.0480121	1.17403	0.16851	1.18602	1.19945
						KLF12	0.057948	1.04565	0.0239786	1.10963	0.998978											0.0327926	1.04939	0.187495	1.05644	1.05642
						LETMD1	0.222959	1.03003	0.020334	1.02871	1.02762											0.0443531	1.04261	0.188621	1.07617	1.02409
						LTB4R	0.176881	1.00583	0.0359232	1.01894	0.995557											0.0426932	1.14783	0.0669639	1.29792	1.08119
						SFRP1	0.0357061	1.16238	0.0287802	1.2852	1.06419											0.0982485	1.34852	0.0350329	0.918955	1.80419
						SH2D1A	0.0436502	1.04524	0.0286355	0.988358	1.0858											0.0349691	1.19945	0.0218245	1.01265	1.30307
						SMC1A						0.0392109	1.29509	0.0119297	0.989964	1.61849	0.220509	1.15466	0.0391905	1.08968	1.11045
						SNAPC5	0.268009	1.05045	0.0307896	0.997156	1.09309											0.0119506	1.29672	0.073414	2.00879	1.05975
						TADA2L	0.000772406	1.04244	0.00633845	0.932377	1.13347											0.0329023	1.08274	0.20242	1.2973	0.995095
						TMEM50A						0.0249528	1.31237	0.0340033	1.31779	1.22705	0.0114027	1.35155	0.0878508	1.45191	1.28124
						TUBB3						0.0255464	1.45313	0.0436722	1.9395	1.12459	0.00774461	1.45599	0.060299	1.46455	1.58945
						XRCC3	0.0232807	1.00272	0.0940642	0.956479	1.0408											0.167962	1.27589	0.0232973	1.36873	1.14237
						ZRSR2						0.0292207	1.18913	0.0281955	1.16166	1.08025	0.0975372	1.20257	0.00284361	1.06153	1.28397
NDE1	Haplotype	Associated	36	27	Decreased	ALX1	0.0319552	1.02958	0.140909	1.04097	1.02048											0.0257836	1.06172	0.218139	1.11999	1.00421
						ARHGAP6	0.922522	1.04734	0.0468052	1.0637	1.03516											0.0281959	1.05135	0.0745994	0.863353	1.29341
						BGN	0.0904439	1.01383	0.00107712	1.00012	1.02439											0.0401587	1.0217	0.0331061	0.782385	1.2954
						CA12	0.650252	1.01179	0.0166656	0.973552	1.04153											0.0112473	1.06611	0.0133509	0.865512	1.27686
						CYB561D2	0.0214461	1.02215	0.121732	0.962147	1.0711											0.0651837	1.0805	0.0216905	0.806193	1.41224
						DAG1	0.0427178	1.00917	0.00533184	0.952757	1.05421											0.111528	1.70276	0.0350251	2.41886	1.07155
						DLGAP4	0.388987	1.05236	0.00308597	1.08482	1.02835											0.0319253	1.89436	0.030135	2.86913	0.738074
						EIF1A	0.75693	1.05774	4.27901e-08	1.18162	0.970513											0.0301203	2.92703	0.0268304	4.53983	1.41634
						EPB41	0.0137653	1.04511	0.0979096	1.06307	1.03235											0.10077	1.06665	0.033471	0.795013	1.39013
						GREM1	0.0941105	1.00062	0.0403217	1.01742	0.987701											0.00256061	1.3697	0.00965731	1.68884	0.985602
						HIST1H2BM	0.0335698	1.13645	0.194838	0.896865	1.35739											0.00233557	1.17171	0.0147608	1.24682	1.10244
						HOXD12	0.0351158	1.0079	0.0533386	1.04733	0.978723											0.0430663	1.08808	0.00552507	1.38022	0.86546
						IFNA10	0.480981	1.01017	0.0256311	1.05493	0.977141											0.0390352	1.2247	0.0101644	1.02887	1.44941
						IGF2	0.448401	1.00138	0.0346285	0.996522	1.00475											0.0414279	1.47895	0.00487329	2.20497	0.944853
						IL18BP	0.0132332	1.01198	0.0380065	1.02836	1.00076											0.036087	1.18006	0.0270391	0.83562	1.60093
						KIAA1524	0.0486797	1.04986	0.123777	0.76878	1.33029											0.261437	1.06684	0.0212608	0.744351	1.48456
						MTMR11	0.290461	1.02107	0.0182307	0.98843	1.04702											0.0271737	1.07183	0.0609086	0.917067	1.2563
						MYOM2	0.0219862	1.09207	0.107018	1.07382	1.11112											0.0173486	1.16367	0.146316	1.22014	1.11158
						PARVA	0.0195675	1.0039	0.16588	0.987386	1.01655											0.00966122	1.13372	0.00323819	1.16241	1.10943
						PCGF3						0.0848352	1.13954	0.0267067	0.827137	1.3467	0.0355748	1.1012	0.142772	1.20772	1.04952
						PKDREJ	0.0194553	1.0101	0.0101521	1.02206	1.00142											0.00273836	1.82314	0.0464545	1.90446	1.74706
						PLSCR4	0.0190718	1.03319	0.0442105	1.08063	0.998706											0.0414802	1.4942	0.0850666	1.89507	1.11726
						RANGRF	0.020557	1.08106	0.0786972	0.915293	1.22683											0.241645	1.12217	0.00585424	0.67909	1.70513
						RBMS1	0.00997069	1.0738	0.00887728	0.802193	1.33868											0.370449	1.09023	0.00404137	0.531564	1.88967
						TACR1	0.0473459	1.03891	0.108715	1.02947	1.0461											0.119193	1.06807	0.00929032	0.681085	1.52498
						TRAF2	0.0286706	1.01738	0.124789	0.968931	1.05509											0.0182718	2.01646	0.0322349	2.45213	1.46703
						ZBTB47	0.0481168	1.01841	0.162482	1.02248	1.01518											0.113041	1.08685	0.0335015	0.957415	1.24934
				9	Increased	AVIL	0.0956854	1.01066	0.0481015	0.983269	1.03162											0.0474492	6.85263	0.0136234	3.19077	11.7786
						CHRAC1	0.0470213	1.0052	0.169022	1.14267	0.910851											0.00924132	1.18348	0.0954712	1.05524	1.34317
						FOXF1	0.018603	1.03317	0.0435905	1.02776	1.03778											0.0256316	1.03021	0.114413	1.10284	0.966734
						GAB2	0.0346241	1.04422	0.11135	1.05806	1.03414											0.0410287	1.24095	0.0554148	1.62945	0.937429
						RCOR1	0.187633	1.01215	0.0316345	1.04529	0.989025											0.0362623	1.00128	0.0631786	1.23693	0.806835
						SHB	0.0177126	1.01489	0.0685495	1.02806	1.00297											0.0266192	1.29379	0.114853	1.42441	1.16583
						SLC22A2	0.000476742	1.0078	0.00886955	0.977101	1.03191											0.095626	1.00415	0.0201364	1.08438	0.93644
						TXNL4A						0.0169111	1.57897	0.0218456	0.925139	2.20409	0.0104672	1.61956	0.0422422	1.12768	2.05078
						YTHDF1	0.21376	1.02963	0.0156145	1.07236	0.998157											0.038733	1.01403	0.0568837	1.17412	0.900504
NDE1	rs4781678	Associated	39	18	Decreased	ABCA7	0.0189172	1.024	0.0693199	1.01594	1.03564											0.676559	1.05621	0.00923085	0.567227	1.70066
						ARL6IP4	0.0248974	1.02456	0.101555	1.03357	1.06408	0.158959	1.21937	0.00831317	1.19472	1.24434	0.0493411	1.00682	0.0418212	0.892626	1.13177	0.0366773	1.49854	0.0417555	1.04816	2.20321
						C11ORF54	0.00499595	1.01625	0.0229222	1.03288	0.984586											0.177238	1.01887	0.0114776	0.77085	1.32229
						CACNA1H	0.0471359	1.00404	0.248004	0.981565	0.994655											0.222221	1.06028	0.025488	0.726358	1.41118
						CD82	0.00188106	1.08289	0.00262657	1.20485	1.10341											0.0289688	1.36155	0.210754	1.41323	1.25892
						CDH5	0.0261673	1.00169	0.102427	1.00747	0.981182											0.635532	1.06	0.034025	0.54077	1.72377
						COMMD3	0.0334095	1.0858	0.141945	1.13731	1.1425											0.0224136	1.08737	0.10768	1.34957	0.883349
						GCGR	0.0373727	1.00707	0.140311	1.09729	0.92727											0.0582949	1.07986	0.033949	1.0602	0.686544
						HTR3A	0.0434793	1.12784	0.141095	1.01158	1.41181											0.111515	1.10537	0.00287174	0.951337	0.849174
						IL18BP	0.0245246	1.01783	0.158747	1.01223	1.00921											0.0875617	1.12224	0.0433035	0.717049	1.55456
						IL9R	0.766689	1.01508	0.0369752	1.05901	0.993168											0.00543787	1.54702	0.0497641	1.46752	1.69547
						KIAA1305	0.0399551	1.03243	0.271039	1.04954	1.03483											0.997512	1.0065	0.0292024	0.677998	1.39333
						MNS1	0.0335835	1.154	0.0687436	1.08924	1.31478											0.415552	1.0708	0.0196657	0.626761	1.57325
						NOX4	0.00651416	1.02883	0.0489422	1.02358	1.02698											0.766698	1.05128	0.019287	0.615486	1.57865
						PCGF3						0.840795	1.04381	0.0150706	0.987985	1.17647	0.0166125	1.00063	0.142772	1.08481	0.930065
						PMM1	0.0611447	1.02797	0.0167135	0.978691	1.07186											0.0267978	1.32052	0.0145284	1.76251	1.267
						RHAG	0.0345197	1.00194	0.215438	1.01668	0.989607											0.596595	1.12426	0.0276818	0.499619	2.02148
						THEM2	0.0163611	1.09678	0.0641704	1.08201	1.18857											0.0217742	1.28275	0.0798378	1.49689	1.2322
				21	Increased	ACTL6A						0.467026	1.08184	0.017391	1.42065	0.840932	0.00837383	1.07398	0.0656619	1.09825	1.0231
						ARHGEF6	0.0392187	1.00295	0.0588369	1.02367	0.917873											0.601688	1.17185	0.0298953	2.00243	0.865541
						CCR2	0.203743	1.1552	0.0327208	1.17566	1.12191											0.0406992	1.66743	0.00382743	4.47763	0.811437
						EIF1AX						0.847154	1.19905	0.0314314	1.23522	1.04319	0.0254955	1.21006	0.00540985	0.985844	1.21372
						FAM48A						0.95334	1.00333	0.0363022	1.08298	0.916487	0.0297824	1.09323	0.0650996	1.12866	1.00164
						FBXW4						0.976039	1.08165	0.00711244	1.24841	0.89932	0.00594666	1.12722	0.0545662	1.0385	1.1853
						FOXJ2						0.978685	1.12001	0.00328341	1.46295	0.866614	0.0392342	1.1152	0.123359	1.27717	1.00392
						GPR23	0.034552	1.01167	0.132351	0.983784	1.01072											0.0759395	1.14698	0.0449631	0.998425	1.06836
						JARID1C	0.779541	1.1011	2.45359e-14	1.01527	1.12231	0.374572	1.04554	5.81004e-05	1.17405	0.842088	0.000616296	1.07688	0.00270422	1.04061	1.03198
						KCNN1	0.084168	1.00256	0.0391203	0.924312	1.10519											0.022077	1.39999	0.0540286	0.922255	1.75135
						KIF13A	0.0396144	1.02031	0.0935603	1.02648	1.03926											0.101648	1.20232	0.0210076	1.67756	1.07211
						LIMA1						0.494971	1.21466	0.0366543	1.56617	0.918481	0.0010781	1.37458	0.00604971	1.47727	1.20952
						PDGFA	0.0188737	1.15376	0.0489118	1.34273	1.13383											0.0785126	1.19543	0.0292038	1.54614	1.33503
						PPP2R3C	0.0396876	1.05852	0.0926757	1.08012	1.02064											0.0485425	1.8157	0.0462231	2.61804	1.54615
						PSD4						0.976579	1.01743	0.00930434	0.992652	0.972459	0.00409418	1.02732	0.00624613	1.07823	0.965044
						RAB13	0.00291368	1.40084	0.0326496	1.51891	1.15155											0.618364	1.0185	0.0476574	1.62051	0.715802
						SCHIP1	0.0387455	1.18154	0.176588	1.099	1.05168											0.0495707	1.69686	0.169049	1.37932	2.68771
						SSX5	0.0229449	1.03154	0.19396	1.02412	1.03385											0.106861	1.27724	0.0213459	1.91682	0.981691
						TXNL4A						0.0497461	1.8927	0.122013	1.10498	2.3946	0.0167044	1.78308	0.0422422	1.17553	2.10498
						UBA2						0.437482	1.08426	0.0204066	1.45237	0.854333	0.0274235	1.07796	0.126477	1.20753	1.04265
						VPS45						0.920873	1.02817	0.0415962	1.04305	0.943863	0.0236808	1.05287	0.09577	1.01519	1.02504
NDE1	rs2242549	Associated	29	13	Decreased	B4GALT1	0.0401099	1.07346	0.00811664	1.02003	1.12187											0.123508	1.14408	0.0249207	0.563239	1.11539
						CD7	0.013212	1.03517	0.0772133	1.0376	1.02194											0.0274277	1.10407	0.034754	0.946106	1.38346
						FCER1G	0.0367416	1.02506	0.110996	0.979191	1.0593											0.00291887	1.01501	0.0233231	0.670082	1.08811
						FGF10	0.0132725	1.03618	0.00373948	1.06049	1.01363											0.00824228	1.08624	0.065067	1.25643	0.926222
						FOXH1	0.234539	1.04955	0.0311063	1.00741	1.0743											0.000246761	2.4565	0.00201536	1.53194	5.13859
						GRIA3	0.0116415	1.09178	0.0410662	1.03816	1.18096											0.0369029	1.24655	0.0595923	1.23557	1.05032
						HOXD12	0.123743	1.01027	0.0374714	0.982797	1.03061											0.0123765	1.00328	0.0131364	0.832435	1.16543
						KCNN1	0.0433313	1.05983	0.0250305	0.97766	1.1599											0.0466642	1.37054	0.0246041	1.01241	1.66206
						KIAA1468	0.084704	1.01798	0.0306693	1.12638	0.943855											0.0487886	1.10215	0.138449	1.27924	0.948407
						PRR16	0.365222	1.01271	0.0298192	1.00099	1.01302											0.017595	1.01967	0.000664511	1.06154	0.840263
						SLC19A2	0.0417235	1.00994	0.0322981	1.06049	0.965061											0.0570719	1.70215	0.0439434	0.851282	2.86913
						ST3GAL5	0.0337961	1.22097	0.0391217	1.12782	1.39534											0.00228704	1.77069	0.012062	2.13337	1.65634
						SULT1A1	0.73375	1.00746	0.0478251	1.01777	1.00725											0.0231505	1.02563	0.0411799	1.09813	0.88112
				16	Increased	BRWD2	0.027948	1.02691	0.0787631	0.942793	1.08896											0.98836	1.04866	0.0302587	0.658375	1.71334
						CLCN1	0.0018225	1.01192	0.00502098	1.01304	0.996699											0.0402932	1.26234	0.115196	0.998263	1.59183
						ERG	0.00598691	1.02586	0.0138523	1.01036	1.00355											0.0230216	1.14067	0.0293386	0.920837	1.38085
						FANCF	0.00197205	1.02687	0.00663614	0.850361	1.19633											0.00146058	1.08646	0.00134919	1.33487	0.808436
						FYCO1	0.0307904	1.03152	0.0508599	0.929786	1.14275											0.943528	1.1002	0.0340453	0.712363	1.79631
						NLGN4Y	0.710018	1.23565	7.77156e-15	1.28358	1.07869											0.0214979	1.15352	0.077694	0.996867	1.38249
						ORMDL2	0.0381188	1.00578	0.0641733	0.928644	1.07411											2.58309e-06	1.15484	4.72556e-05	1.14552	0.812748
						PDE8B	0.234513	1.00909	0.0395735	0.993703	1.02693											0.0219677	1.48796	0.0711556	1.77468	1.32035
						PLSCR4	0.00176218	1.01108	0.00973757	0.998856	1.02209											0.0475163	1.27278	0.193051	1.43651	1.03084
						SCYL1	0.310519	1.09899	0.00941667	0.913493	1.26118											0.0138774	1.1252	0.0507766	1.455	0.937801
						SLC5A1	0.162926	1.00634	0.0392276	1.03526	0.969856											0.0073054	1.01806	0.0103047	1.04397	0.867885
						TRIOBP	0.0309674	1.04542	0.0322913	0.871431	1.18178											0.113582	1.08942	0.0411319	1.60607	0.640841
						UCHL1	0.0251414	1.60508	0.04682	1.37938	1.68817											0.0401548	1.33661	0.0463393	1.80091	1.01488
						UTP18	0.042929	1.06429	0.0121509	0.915715	1.20155											0.0747806	1.12261	0.0339675	1.01175	1.36406
						ZNF179	0.0194645	1.03038	0.106134	0.987088	1.05693											0.0024933	1.06253	0.00506106	1.16895	0.950573
						ZNF500	0.0194784	1.01807	0.0935027	1.04974	1.0006											0.0734997	1.24377	0.0277146	0.99156	1.56615
NDE1	rs881803	Associated	52	18	Decreased	ACTL7A	0.016014	1.00445	0.0402192	1.02326	0.988358											0.755151	1.01208	0.033126	0.829001	1.46977
						AP1GBP1	0.620898	1.01416	0.0293673	1.02031	1.00951											0.040616	1.03886	0.0910897	0.920491	1.25909
						ARSG	0.899539	1.02714	0.0487377	1.03082	1.02224											0.042201	1.08022	0.00706413	0.760558	3.75809
						B4GALT1	0.032685	1.07968	0.00668412	0.988469	1.17973											0.0912987	1.26	0.0206052	0.958578	1.15686
						BTF3L1	0.0315452	1.02061	0.0982375	1.01395	1.02349											0.0272065	1.14682	0.035254	0.923645	1.60409
						C14orf131	0.152135	1.02397	0.00865862	1.08318	0.959798											0.0406877	1.0417	0.195267	0.996862	1.04505
						CSPP1	0.104587	1.01809	0.0115056	1.14827	0.900185											0.0142779	1.11599	0.0375286	0.891302	1.59016
						DNAJC15						0.0471025	1.21612	0.144942	1.23811	1.19168	0.0101552	1.38394	0.0882287	1.3959	1.37013
						DPH2	0.586137	1.02865	0.042546	1.14348	0.917138											0.0308585	1.06701	0.019697	1.02681	1.23561
						EFNA5	0.865775	1.0074	0.0295124	0.967596	1.04419											0.0364746	1.05525	0.175898	0.940592	1.32192
						ERP29	0.021254	1.01545	0.0977523	1.08367	0.963863											0.0833638	1.4557	0.0255575	1.00638	1.97422
						FKBP2	0.128784	1.0236	0.0262059	1.06833	0.981107											0.0243837	1.0355	0.0573505	0.886094	1.34421
						FOXH1	0.623057	1.04158	0.0166776	1.01603	1.05979											0.0147465	1.95664	0.0385726	1.07328	4.30473
						INOC1	0.219456	1.02479	0.011275	1.10353	0.946331											0.0395364	1.03415	0.0993799	0.920419	1.19335
						KIAA1305	0.00382005	1.00308	0.00957987	1.03251	0.975819											0.884967	1.03532	0.0170601	1.29582	0.722342
						MGLL	0.818699	1.07607	0.0473612	1.33388	0.864819											0.0316488	1.13345	0.0200461	1.10118	1.19066
						N-PAC	0.421562	1.02293	0.0114647	1.11285	0.939711											0.0206807	1.44531	0.0192124	1.04788	2.16919
						PSMC1	0.944045	1.00798	0.0118075	1.11032	0.914826											0.00433582	1.04215	0.00603966	0.796932	1.4439
				34	Increased	BCL2L11	0.112273	1.01845	0.0424592	0.999922	1.03114											0.0302045	1.10785	0.0346989	1.47013	0.784591
						CRB1	0.750564	1.00148	0.043095	0.993134	1.00136											0.0186806	1.01819	0.0540918	1.272	0.57059
						DZIP1	0.0551176	1.01958	0.00933727	0.988865	1.05986											0.0494425	1.07079	0.019326	1.48095	0.79498
						FASTKD2	0.704931	1.01601	0.033161	0.893835	1.16205											0.0089949	1.13282	0.0189733	1.21014	1.09746
						FUT2	0.611196	1.00073	0.0264253	1.00088	1.00385											0.0178385	1.09703	0.108117	1.06115	1.13274
						GJB3	0.366415	1.01389	0.0321195	1.00985	1.00995											0.0080926	1.30212	0.0216082	1.64456	1.02503
						GLT25D1	0.0338904	1.06459	0.207971	1.01176	1.11781											0.608308	1.05646	0.0400987	0.860449	1.50284
						GREM1	0.124659	1.00301	0.0256542	1.02914	0.979756											0.0459194	1.61906	0.0136816	1.66253	0.985602
						GUF1	0.466431	1.0654	0.0283623	0.868581	1.28237											0.0274895	1.18507	0.108167	1.2126	1.17239
						HIST1H2AE	0.0132914	1.02522	0.0997835	0.936834	1.11178											0.136778	1.04085	0.0239718	1.19598	0.85808
						HOXD11	0.00471589	1.0118	0.0173898	1.00938	1.00963											0.00716778	1.04592	0.013945	1.26334	0.913679
						IGF2AS	0.854133	1.02905	0.0369238	1.05928	1.00871											0.0155629	1.03161	0.135081	1.11193	0.903924
						KIAA1377	0.799172	1.03229	0.0205963	1.02013	1.0387											0.0399817	1.14608	0.0131598	1.34411	0.774739
						NDUFA4	0.721107	1.01211	0.0436825	0.990281	1.03367	0.027872	1.10741	0.107397	1.17239	1.05716	0.0308965	1.03709	0.201132	1.0741	1.0073	0.159757	1.40651	0.0481245	2.27647	0.822485
						NEIL3	0.0318777	1.0386	0.190388	0.929602	1.16715											0.0609456	1.05799	0.028412	1.26802	0.832244
						NOX4	0.0409688	1.00606	0.106062	0.997943	1.0124											0.958429	1.01229	0.0245678	0.759108	1.57376
						PAPD1	0.667967	1.08629	0.0279131	0.895414	1.30776											0.00982612	1.07042	0.105751	1.00671	1.22003
						PHOX2B	0.03109	1.00965	0.182419	1.00433	1.0149											0.916731	1.00837	0.0411067	0.831295	1.41296
						PNMT	0.203706	1.0387	0.0445978	1.01787	1.06448											0.0405385	1.01838	0.183356	1.0986	0.902826
						PRAMEF2	0.538517	1.01856	0.0360938	1.0064	1.02882											0.0223532	1.16219	0.0323835	1.27778	1.10192
						RECQL4	0.0426723	1.04105	0.10389	0.945406	1.1464											0.832909	1.12724	0.0215188	0.779802	1.94583
						SCYL1	0.304528	1.07385	0.0117388	0.974889	1.17085											0.0189903	1.1891	0.07265	1.46845	0.997823
						SLC7A9	0.0313432	1.01223	0.0275873	1.02085	1.00121											0.034621	1.15874	0.130604	1.30896	0.888191
						SNAP91	0.0322255	1.00809	0.106682	0.978192	1.03919											0.141846	1.04256	0.0195022	1.64573	0.567552
						SNX17	0.817206	1.00973	0.0283352	0.951062	1.06555											0.0340832	1.14895	0.00974032	1.53709	0.734254
						SOX10	0.0760746	1.02407	0.0118888	1.0258	1.01882											0.00161988	1.33439	0.00390882	1.4274	1.40859
						SUPT3H	0.0379058	1.00282	0.0100552	0.98595	1.02797											0.0172587	4.64735	0.0267483	9.22237	0.658543
						SYN2	0.027632	1.0067	0.124333	1.02156	0.998787											0.980594	1.0076	0.0149248	1.21165	0.913672
						TCEAL4	0.182032	1.05648	0.00538657	0.980861	1.10803											0.0377947	1.00122	0.0945885	1.18018	0.89665
						TRIOBP	0.0390518	1.00484	0.0792939	0.935616	1.08379											0.116126	1.15988	0.0283853	1.67562	0.658567
						USP5	0.0674994	1.00892	0.0434403	0.996518	1.01977											0.00868349	1.18256	0.0608637	1.24409	1.16363
						VASH1	0.0444091	1.00939	0.23628	1.01059	1.00802											0.0555835	1.06507	0.0391928	1.24805	0.781758
						WNT7A	0.0420534	1.04477	0.0222466	1.08108	1.01227											0.054242	1.01803	0.0222166	1.4659	0.746067
						ZRSR2						0.354399	1.06538	0.0110504	1.00282	1.10504	0.0431794	1.06315	0.00948335	1.08358	1.04366
NDE1	rs2075512	Associated	18	10	Decreased	CHMP1A						0.371701	1.11681	0.0178617	0.811319	1.57631	0.0179486	1.00892	0.129856	0.919697	1.09697
						CRAT	0.0405132	1.02086	0.0328746	1.02991	1.01898											0.0334882	1.28842	0.237499	1.20565	1.30082
						HIST1H2BM	0.0130866	1.21129	0.0915984	1.55547	1.28447											0.0295659	1.14227	0.206898	1.26265	1.09513
						HOXD3	0.0361889	1.01884	0.238168	1.00758	1.04625											0.0125094	1.45254	0.107968	1.31989	1.57601
						IL9R	0.969298	1.00186	0.0216696	0.964959	1.00482											0.00578855	1.41526	0.00988653	0.996149	1.86156
						MET	0.0129471	1.02145	0.0164857	1.05192	0.987395											0.0305792	1.04809	0.167193	1.45963	0.910417
						STAP1	0.34481	1.04625	0.0101858	1.03327	1.13174											0.0210908	1.56288	0.000136234	0.896843	2.547
						TPM4	0.0720496	1.1165	0.0125177	1.23667	1.13246											0.0119931	1.39995	0.0566853	1.09316	1.63382
						ZNF140	0.184672	1.03074	0.0385233	1.00706	1.03778											0.0062339	1.83286	0.0199399	1.32907	2.26003
						ZNF500	0.0494909	1.03821	0.253568	1.07362	1.02555											0.130992	1.32677	0.0367174	0.944682	1.74531
				8	Increased	FAIM3						0.010902	1.61723	0.0495081	1.85924	1.37834	0.00996222	1.5378	0.0665848	1.80467	1.31454
						FOXN3						0.199697	1.35785	0.0471784	1.81133	0.996958	0.00363463	1.3124	0.00500365	1.67751	1.01489
						IRF8						0.0403054	1.36712	0.159768	1.295	1.38477	0.0121867	1.408	0.0668908	1.46626	1.30609
						ITK	0.0288432	1.03584	0.0201052	1.01553	1.06484											0.0355976	1.42169	0.0564359	0.965702	2.29563
						MEX3C	0.373182	1.01676	0.0126143	1.04919	0.993519											0.0267326	1.00618	0.179446	1.02085	0.958793
						OVGP1	0.826935	1.08461	0.0292059	1.2039	1.05177											0.0262237	1.16463	0.0746099	1.19335	1.08226
						TXNL4A						0.00442471	2.15015	0.0116776	1.49417	2.71283	0.00487753	2.0465	0.0107407	1.55795	2.39062
						ZHX2	0.0167534	1.11251	0.00206542	0.996216	1.15226											0.0571606	1.56331	0.0262237	0.744559	2.20829
NDEL1	Haplotype	Associated	20	3	Decreased	APP	0.0377898	1.18665	0.0365904	1.00098	2.56545											0.441777	1.0302	0.0481977	1.15743	0.847559
						BANK1	0.0103792	2.03809	0.0206837	1.98208	0.800853											0.337242	1.01126	0.0320571	1.13984	0.87259
						SDCBP2	0.0419643	1.10841	0.148049	1.10656	1.004											0.409666	1.02132	0.0333138	1.15098	0.835107
				17	Increased	ACTL7B	0.0131063	1.14166	0.0718434	1.14117	1.00519											0.126023	1.30339	0.0225022	1.83233	0.533942
						AIRE	0.0255087	1.20883	0.0491331	1.19126	1.05543											0.0187798	1.12109	0.0414889	1.09589	1.13057
						CD93	0.000211655	9.96877	0.00196475	9.86157	1.38989											0.0420868	1.05721	0.00872814	1.00533	1.09122
						CLINT1	0.00950366	2.37822	0.0286337	2.48975	1.13327											0.211875	1.0242	0.0377407	0.906829	1.23554
						CYB5R4						0.298716	1.01063	0.00445563	0.773921	1.23438	0.0431924	1.1728	0.176464	1.23461	1.12226
						DPP4	3.94294e-05	5.29844	0.000475037	5.23684	1.13711											0.18498	1.03992	0.0164086	0.897976	1.29904
						FRZB	0.00160307	1.28011	0.0117337	1.28498	0.975808											0.0462837	1.08528	0.0669202	1.03443	1.15056
						HOXB8	0.00218799	1.1767	0.00392691	1.16808	0.922626											0.234694	1.02358	0.0417227	0.894783	1.25318
						IFNB1	0.000295439	1.60731	0.00285182	1.59834	1.00644											0.0958971	1.26132	0.03071	1.48243	0.731761
						NOTCH4	0.0298156	1.27596	0.125627	1.28237	0.956067											0.0692777	1.12729	0.0296003	1.36896	0.798122
						OXSR1						0.168157	1.06199	0.00122028	0.875547	1.25832	0.00630983	1.18122	0.0337913	1.21483	1.14916
						POLA1						0.219941	1.02764	0.0175213	0.94844	1.11098	0.0234005	1.17319	0.110744	1.22595	1.12779
						PTGS1	0.00237421	4.64522	0.00841759	4.44399	0.939785											0.00399488	1.13574	0.0360403	1.17594	1.13741
						RABEPK						0.0834172	1.05376	0.00738517	1.06298	1.05116	0.0128669	1.1842	0.0508761	1.29176	1.0981
						SPG3A	0.00542205	1.28823	0.0270082	1.28159	0.98028											0.361991	1.00199	0.0277056	0.84503	1.2914
						WDR57						0.27735	1.06971	0.0209621	0.831352	1.30539	0.0431049	1.16127	0.139613	1.15911	1.15571
						ZAP70	0.0144365	1.62736	0.0485472	1.6741	0.997766											0.0330547	1.36542	0.0245546	1.8045	0.808732
NDEL1	rs17806986	Associated	2	2	Increased	LPIN1	0.0187038	1.40394	0.0942172	1.51048	1.37504											0.0113255	1.59183	0.00894976	0.493712	4.6075
						TAF5L	0.651306	1.02532	0.0280264	1.00198	1.07999											0.0439272	4.68156	0.0121825	0.995052	8.38221
PDE4B	Haplotype*	Associated	4	1	Decreased	CLP1						0.046362	1.2116	0.248475	1.19444	1.22438	0.0482924	1.38034	0.0869058	1.46433	1.34961
				3	Increased	DRP2	0.108831	1.00319	0.0255631	1.00211	1.00343											0.0363959	1.26035	0.184212	1.21103	1.30807
						GAS7	0.480616	1.00137	0.0231637	0.97559	1.02361											0.0434588	1.16503	0.232546	1.2419	1.09196
						PI15	0.00373386	1.02105	0.0081909	0.999034	1.03542											0.0846888	1.64201	0.0216157	0.919157	2.67857
PDE4B	Haplotype#	Associated	31	5	Decreased	CD160	0.0364063	1.03386	0.171763	1.00196	1.06727											0.0497957	1.06996	0.301484	0.951169	1.24466
						CUTA						0.0335319	1.15243	0.213084	1.11953	1.15182	0.0470917	1.20216	0.147547	1.01781	1.32149
						ERBB3	0.0395244	1.05222	0.105088	1.08558	1.02025											0.0285973	1.02044	0.06246	0.906189	1.23486
						FKBP8	0.00480216	1.01823	0.0455634	1.05394	0.983416											0.244048	15.7048	0.030549	0.470998	88.1045
						MYCN	0.0408676	1.04931	0.0951377	1.01142	1.08914											0.9155	1.03664	0.0417737	1.24923	0.844381
				26	Increased	AK2	0.0283622	1.1537	0.087199	1.03979	1.28261											0.23601	1.12154	0.0188761	0.95144	1.46811
						C11ORF58	0.0346347	1.15111	0.19002	1.1213	1.18309											0.0424664	1.757	0.0486617	2.19424	0.822559
						CPOX						0.00209427	1.81716	0.00741447	1.24013	2.17308	0.0207952	1.58749	0.0635548	1.85553	1.4443
						CRYBB2	0.0479164	1.36511	0.281251	1.40387	1.32901											0.0976039	1.08705	0.0349113	1.19823	0.846871
						CYP2J2	0.0329207	1.01534	0.118098	0.865041	1.19656											0.0417645	1.29652	0.0791889	1.2468	1.33529
						DENR	0.0284623	1.20459	0.176397	1.15977	1.25277											0.0329804	1.2652	0.143201	1.38861	0.779471
						EID1						0.0490432	1.73335	0.187167	1.79866	1.61265	0.0546844	1.56816	0.0391516	2.56896	1.07978
						KIF2A						0.0261623	1.06572	0.147633	1.05269	1.06624	0.0245941	1.43632	0.0653792	1.9195	1.18802
						LIMA1						0.0257073	1.43642	0.142135	1.60814	1.28547	0.00351703	1.56995	0.0271614	1.57282	1.51914
						LYPLA3	0.0437272	1.09029	0.163099	1.09788	1.08373											0.0391662	1.53635	0.0094431	2.20854	0.578001
						MAGMAS	0.0356785	1.14526	0.1124	1.05673	1.2417											0.0889567	3.0546	0.0163924	5.8207	0.461332
						MED21	0.0458851	1.17496	0.188526	1.12677	1.22376											0.26805	1.0761	0.0303901	0.996387	1.23063
						MYOM1	0.567422	1.05603	0.0118016	1.00952	1.10338											0.00906041	1.26887	0.0217237	1.3396	1.13856
						NCAPH2	0.0418947	1.01068	0.125823	0.941631	1.08662											0.0423899	1.14004	0.0483741	1.14379	1.1585
						NGFB	0.0178936	1.10317	0.073852	1.10024	1.10688											0.454347	1.06929	0.0367674	0.875485	1.45682
						NPTN						0.0168973	1.21512	0.123477	1.1101	1.25825	0.0223414	1.4201	0.0286051	1.98185	1.11099
						PCYOX1L	0.0455336	1.25343	0.0279107	1.02039	1.54383											0.298655	1.07432	0.0471773	0.957711	1.37123
						PNPO	0.0418165	1.12438	0.00140333	1.01517	1.24789											0.784017	1.17236	0.0015004	0.382037	2.97407
						RAB6B	0.0234474	1.15174	0.19032	1.16176	1.14197											0.144427	1.51629	0.0020716	0.876462	2.82576
						RANGRF	0.0174215	1.14649	0.142395	1.10983	1.18521											0.452345	1.09646	0.0483617	0.864032	1.5945
						SERPING1	0.0108599	1.06325	0.00227998	0.984475	1.14933											0.138374	1.79144	0.0409978	2.88456	0.407822
						SNX12	0.000768271	1.17402	0.0077109	1.12695	1.22394											0.403656	1.07528	0.0481454	0.914949	1.38899
						TIMM8A	0.00980262	1.26744	0.0183254	1.09203	1.47364											0.113919	1.10934	0.00312905	0.99109	1.46037
						TMED1	0.0476804	1.00912	0.210694	1.01277	1.00617											0.0132223	2.24248	0.0194722	3.03257	0.993717
						TRIM21	0.009563	1.00251	0.0903227	1.0285	0.977518											0.0862567	1.40313	0.0421972	1.04426	2.10538
						UTP11L	0.00873765	1.27802	0.0244571	1.11943	1.46201											0.0133897	2.48917	0.107949	2.26755	2.89997
PDE4B	rs2503177	Associated	14	4	Decreased	F3	0.0470527	1.00348	0.0654158	0.999484	0.998163											0.989059	1.07833	0.00191778	1.13776	0.921965
						G3BP1						0.0144098	1.53438	0.0522957	1.55829	1.10981	0.0448001	1.55025	0.149084	1.52311	1.2061
						LIMA1						0.0424511	1.16549	0.0966941	1.06475	1.37772	0.00670926	2.01238	0.0141537	1.87268	1.62797
						STRAP						0.0321191	1.18002	0.104577	1.18731	1.11917	0.00531188	1.64901	0.0273318	1.67682	1.14598
				10	Increased	ASCC3L1						0.0347404	1.11949	0.157096	1.12923	0.890142	0.000174689	1.52579	0.00187237	1.48949	0.974925
						CCDC85B						0.0490293	1.14101	0.0275837	1.2155	0.936777	0.00654021	1.67507	0.0129949	1.72776	1.03949
						CD27						0.0249263	1.98487	0.0906206	2.11922	1.03357	0.0389216	1.81455	0.120282	1.87172	1.12
						CDK6	0.0088192	1.11419	0.0330627	1.10797	1.02183											0.0304259	1.59324	0.118574	1.56389	1.26896
						ENDOGL1	0.018966	1.08406	0.0208534	1.09592	0.897933											0.0459835	1.79229	0.0537477	1.6528	1.34684
						NCKAP1L						0.0210625	1.7665	0.0604908	1.85482	1.04889	0.0133149	1.76542	0.0293044	1.85433	1.13278
						PEBP1						0.0132326	1.10569	0.0254815	1.15848	0.823717	0.0350687	1.56145	0.0957871	1.54669	1.04595
						SNF8						0.0370053	1.57139	0.0639236	1.5061	1.05289	0.0604117	1.6269	0.0432543	1.62574	1.07213
						TRAPPC2L						0.00782092	1.81498	0.00432937	1.73596	1.1856	0.00442362	1.84519	0.0056728	1.76174	1.20251
						UCK2						0.0302907	1.19308	0.104791	1.20463	0.897508	0.0346198	1.46843	0.141951	1.4332	0.994323
PDE4B	rs2503166	Associated	13	10	Decreased	DEGS1						0.0323186	1.46218	0.0338969	1.34559	1.52837	0.00788345	2.21464	0.00301717	1.83433	2.91696
						G3BP1						0.0169942	1.41081	0.0308526	1.46867	1.3283	0.0109591	1.41088	0.0438051	1.2799	1.59357
						LARP1						0.00645611	1.19989	0.0312754	1.32968	1.08153	0.0349567	1.21715	0.197314	1.19394	1.25043
						PAX8	0.0208629	1.01582	0.0609603	1.01984	1.01001											0.884948	1.04373	0.0358215	1.10201	0.734683
						RMND5B	0.0201145	1.0206	0.170174	1.05017	1.00658											0.803427	10.8484	0.000888148	1.19195	85.1922
						RP6-213H19.1						0.0246364	1.67554	0.117775	1.86545	1.52135	0.00159834	1.99931	0.0100333	2.18828	1.94397
						SMC1A						0.0453202	1.30756	0.0300919	1.29093	1.37819	0.020293	1.50235	0.00136075	1.37313	1.72695
						TTLL12	0.041744	1.22027	0.240018	1.33993	1.15692											0.557983	1.25426	0.0372789	1.53089	0.724269
						VEGFA						0.0085226	1.37477	0.039607	1.50092	1.3354	0.0331263	1.43294	0.111097	1.22782	1.7827
						ZMYM2						0.0277439	1.45411	0.184448	1.56463	1.34908	0.0035036	1.60465	0.0365824	1.61672	1.64564
				3	Increased	OTUD3	0.0939714	1.00717	0.0347258	1.08551	0.937924											0.0235176	1.47844	0.135584	1.71935	0.931623
						PRMT1						0.0021156	1.25341	0.00975476	1.13058	1.3983	0.0337718	1.26534	0.0522608	1.09624	1.50154
						TMEPAI	0.00024833	1.00169	0.00339873	1.02508	0.979359											0.534786	1.11025	0.0452769	1.00125	1.27962
PDE4B	rs7412571	Associated	83	37	Decreased	AVEN	0.0180646	1.01237	0.05219	1.01879	0.994573											0.317051	1.20715	0.0419005	0.915025	2.10413
						B3GALT2	0.0233157	1.02601	0.0281183	1.00527	1.04273											0.0299436	1.39744	0.0318563	1.2656	1.66452
						C14orf162	0.0352813	1.02133	0.0966433	1.01419	1.02549											0.0265389	1.15787	0.0203259	1.33468	1.06299
						C2ORF56	0.354155	1.00442	0.0441158	1.03905	0.98701											0.0409468	1.31779	0.054729	1.34545	1.33119
						CCNO	0.0123757	1.00595	0.0911744	1.00548	1.00394											0.038513	1.16156	0.215629	0.982367	1.3745
						CXORF48	0.683388	1.00746	0.0176966	1.02016	0.986801											0.0295716	1.04536	0.0729238	1.05625	0.989725
						CYP39A1	0.011218	1.06212	0.0437671	1.08481	1.04731											0.0023897	1.09166	0.0216849	1.24836	0.964514
						DAZ3	0.0376383	1.02938	0.0978717	1.06181	1.01075											0.0204161	1.21891	0.0774573	1.12595	1.36343
						EFCAB1	0.0208031	1.01469	0.0828093	0.998757	1.0369											0.0220562	1.11155	0.0581954	1.15396	1.06892
						HCG9	0.033592	1.02426	0.015806	1.02582	1.01476											0.0668738	1.1287	0.0264875	1.00143	1.39957
						HHLA3	0.0413567	1.01624	0.215925	1.03359	1.02585											0.138206	1.18875	0.0250555	0.881498	2.27387
						HIST1H2BN	0.220264	1.04075	0.0468592	1.06279	1.0292											0.0479152	1.03108	0.176399	0.974627	1.05068
						HSF4	0.345537	1.11789	0.0254826	1.40472	0.847191											0.0357232	1.11258	0.0709274	1.11564	1.1152
						KIAA1609	0.0204487	1.02619	0.0258096	0.976713	1.07846											0.024106	1.01421	0.039492	1.24571	0.869429
						LAPTM4B	0.00867369	1.3895	0.0324054	1.11723	1.95975											0.033605	1.07382	0.0131116	0.999291	1.17036
						LILRA1	0.0310379	1.01684	0.0522332	1.0583	0.971717											0.333294	1.12225	0.0259213	1.35294	1.04816
						LRRC20	0.0403858	1.0092	0.117713	1.04843	0.97401											0.0190477	1.4867	0.0904885	1.16491	1.68853
						MANSC1	0.0017772	1.01987	0.0272889	1.00879	1.0346											0.0485862	1.36919	0.0541771	1.17252	1.72878
						MATK	0.809216	1.00296	0.0239816	0.966068	1.03981											0.0401065	1.03993	0.0950906	0.934451	1.07601
						MRVI1	0.0280457	1.00527	0.019879	1.02054	0.980409											0.0395003	1.04423	0.0296569	1.02826	1.09418
						MYH1	0.0191071	1.02211	0.0673088	1.0437	0.999989											0.0156164	1.16791	0.0638558	1.18042	1.12019
						NT5M	0.125773	1.00232	0.00279077	1.00252	0.968307											0.0459343	1.3743	0.0560702	1.21995	1.82664
						OIP5	0.245341	1.03594	0.0191703	1.06434	1.044											0.0130851	1.06079	0.0542347	1.02486	1.05912
						PAX2	0.256094	1.00366	0.039323	0.985005	1.01243											0.0201082	1.67554	0.0577669	2.21962	1.43396
						PCDHB13	0.0332269	1.03453	0.135445	1.00151	1.0867											0.0144244	1.21083	0.0635769	1.12358	1.26513
						PCDHB2	0.0394059	1.02535	0.116611	0.999626	1.05269											0.0186339	1.08565	0.0162863	1.20795	0.998365
						PDLIM4	0.0388	1.0128	0.239429	0.986291	1.04222											0.0276169	1.8581	0.118149	2.42908	1.50933
						PLSCR2	0.0298358	1.0117	0.0805334	1.0029	1.02289											0.0193802	1.27647	0.0815556	1.1968	1.26874
						RARB	0.0128114	1.00469	0.0220546	0.979854	1.03217											0.0360828	1.12181	0.0933943	1.18739	1.05486
						SCN9A	0.0486738	1.01079	0.164305	0.99873	1.00599											0.327688	1.06855	0.0256398	1.13879	1.0943
						SCRN1	0.146955	1.01218	0.0452684	1.08866	0.917222											0.00651496	1.0772	0.0411774	0.793478	1.40204
						SDCCAG10	0.298404	1.00159	0.0453261	1.07578	0.938104											0.020457	1.13669	0.0410795	1.14289	1.10973
						SEPT4	0.029965	1.01398	0.0433597	1.01033	1.01146											0.0197837	1.04493	0.0786789	1.11537	0.967667
						SLC17A3	0.0609911	1.00432	0.0281274	0.987493	1.01709											0.033038	2.01024	0.101206	3.51282	1.39948
						SV2B	0.0190411	1.09935	0.042939	1.16236	0.903162											0.0347584	1.0787	0.0625692	1.13574	1.04211
						SYCP1	0.40788	1.0001	0.04743	1.02317	0.976968											0.0112609	2.19709	0.0350728	2.20777	2.28492
						TFAP2B	0.0204384	1.02505	0.0577908	1.07769	0.983523											0.0160228	1.09744	0.0806499	1.20122	1.01228
				46	Increased	AKT2	0.00975919	1.05425	0.0158531	1.05109	1.03899											0.0101874	4.58504	0.000561437	1.28994	6.54952
						ANXA9	0.035571	1.02613	0.0491232	1.0266	1.02055											0.078026	1.16161	0.0434367	1.19673	1.02385
						BAIAP2	0.652619	1.03133	0.0457734	1.02782	1.04162											0.0390453	1.00912	0.0422023	1.01834	1.01312
						BARX2	0.0327687	1.02382	0.103557	1.01382	1.04566											0.0189704	1.48322	0.00941111	0.864899	2.09751
						C17ORF81	0.020828	1.12279	0.110231	1.08251	1.15603											0.325525	1.03229	0.0499152	1.09193	0.92705
						CAPRIN1	0.0145933	1.09403	0.00727532	1.09437	1.08311											0.61333	1.08398	0.0158512	0.857047	1.2823
						CCNE1	0.0340752	1.0484	0.0115983	1.09288	1.01393											0.318822	1.04026	0.014767	0.903406	1.12625
						ERF	0.0180351	1.00036	0.0276334	1.03638	0.960972											0.0188119	2.81866	0.00328922	2.07556	3.81824
						ETV7	0.0639552	1.04224	0.0471376	0.932394	1.18464											0.0498608	1.00617	0.0619302	1.09203	0.950627
						FABP5	0.0470954	1.11333	0.0502452	1.18854	1.05779											0.0333519	1.07042	0.205454	0.921946	1.23644
						FARSA	0.0488387	1.06573	0.119496	1.05825	1.07138											0.110209	1.15069	0.0078924	1.7342	0.667307
						GBL	0.000843847	1.07692	0.0001556	1.07073	1.07047											0.485073	1.09083	0.0160894	0.915864	1.22581
						GUF1	0.0595798	1.14025	0.00626463	1.0512	1.21408											0.0422567	1.02731	0.174405	0.965812	1.12565
						HBEGF	0.0355743	1.1162	0.0290295	1.13424	1.07875											0.573906	1.44318	0.0334397	2.19713	0.936718
						KIAA0100	0.034241	1.17606	0.0567758	1.17856	1.17748											0.0362873	1.00289	0.0732654	1.16654	0.954141
						KLRC1	0.0281693	1.0113	0.0667167	1.00751	1.02724											0.0571438	1.36733	0.0203893	0.821679	1.91317
						LARP5	0.0850388	1.06657	0.0231295	1.08792	1.03506											0.0116097	1.03016	0.0276023	0.889704	1.1488
						MASP1	0.0421695	1.01957	0.135713	1.01402	1.02111											0.485256	1.06465	0.0259549	0.947942	1.12591
						MFAP3L	0.151434	1.02504	0.0401585	1.02266	1.02767											0.0104109	4.56405	0.000549487	1.25612	6.50835
						MRPL27	0.00270129	1.17842	0.012728	1.13687	1.1838											0.539273	1.02081	0.0139295	0.938673	0.976303
						NAT10	0.0278849	1.06354	0.0156309	1.08022	1.02559											0.120925	2.29499	0.0148538	0.927017	3.50102
						NFKB2	0.143548	1.05147	0.0249215	1.12351	0.981863											0.010666	4.5968	0.000548225	1.02886	6.56208
						NUDT6	0.0389381	1.0118	0.0420257	1.01673	1.00852											0.121366	1.41215	0.0428159	1.81974	1.04864
						OGN	0.0240199	1.02323	0.011735	1.02883	1.01437											0.180976	1.60315	0.00390782	2.06119	1.18541
						OXT	0.0157938	1.01345	0.0404783	1.00516	1.01074											0.024905	1.12247	0.151519	0.962516	1.26801
						PEPD	0.0131783	1.03746	0.0435942	0.960711	1.15064											0.0493997	1.78152	0.00887715	0.684121	2.81091
						PFAS	0.0010004	1.04988	0.000261112	1.08447	0.992913											0.201807	1.22304	0.0422084	1.52208	0.978975
						PGR	0.0116596	1.0014	0.0255972	1.02514	0.984023											0.0341456	2.47091	0.00421789	0.864932	3.7803
						POU2F1	0.0498332	1.06629	0.202895	1.12404	1.01289											0.762702	1.1994	0.0370823	1.17217	1.16147
						PRKY	0.428423	1.18945	0.00680032	1.40196	0.995975											0.0104042	4.64161	0.000555217	1.1112	6.62432
						RMND1	0.137891	1.00375	0.0391269	0.95662	1.03671											0.0107663	4.65196	0.000557176	0.912904	6.64494
						RPL13	0.798862	1.13899	0.0448546	1.20982	1.08655											0.0487703	1.9801	0.0117813	0.974956	2.92572
						SCGB1D2	0.0203965	1.00385	0.0585987	1.01214	0.982494											0.175042	1.02722	0.0401695	1.32196	0.682967
						SEC31A						0.375942	1.0914	0.0180619	1.38036	0.747621	0.0430888	1.14966	0.129095	1.22914	1.02621
						SEPT2						0.064004	1.23475	0.0205756	1.49075	0.948591	0.0368966	1.26433	0.0355775	1.29135	1.22697
						SLC10A3	0.0426776	1.01308	0.237692	1.10303	0.890421											0.323238	1.09227	0.0397067	1.22744	0.953193
						SPCS2	0.0129084	1.02149	0.0552619	0.998096	1.03284											0.325728	1.23553	0.0209241	1.44727	1.01725
						TBL3	0.0315784	1.04853	0.00503957	1.04649	1.03551											0.0396716	1.15921	0.0153862	0.96243	1.22713
						TBXAS1	0.0420519	1.07075	0.0158577	1.01956	0.998115											0.851279	1.16933	0.0442485	1.1326	1.1462
						TLL1	0.195845	1.03844	0.017639	1.00973	1.06556											0.011487	4.5327	0.000559594	0.919028	6.47903
						TMEM29	0.0188715	1.16899	0.0518417	1.15659	1.16913											0.709425	1.06793	0.036366	1.13558	0.892634
						TNFAIP8L2	0.0340586	1.12955	0.0155848	1.10308	1.16675											0.0112392	4.46682	0.00053905	0.854836	6.39751
						TRIM13	0.0408428	1.03807	0.128119	1.02898	1.03843											0.00609429	1.07448	0.0236608	1.24525	1.00873
						TUBB4Q	0.176912	1.00679	0.0496555	0.992924	1.03124											0.00422761	1.13215	0.0306734	0.807956	1.46453
						VILL	0.0162219	1.05235	0.0342428	1.05168	1.0489											0.180983	1.82077	0.0451512	0.933212	2.65721
						WT1	0.0204611	1.05594	0.00117683	1.06139	1.04638											0.0326174	1.4538	0.0532612	1.35853	1.51925
PDE4D	Haplotype	Associated	36	3	Decreased	CCDC132	0.033384	1.03004	0.203542	0.998817	1.0616											0.0151232	1.10545	0.0272391	0.647245	2.93012
						PPP1R3C	0.0221382	1.06235	0.00311404	1.01374	1.10804											0.0140324	1.67768	0.126708	1.85206	1.60357
						SLC12A4	0.286157	1.04312	0.0225795	0.915404	1.17506											0.0174369	1.20935	0.0266767	0.913518	1.74479
				33	Increased	ARGLU1	0.0399727	1.05895	0.0145926	1.11638	1.00534											0.03218	1.19882	0.0445751	1.12096	1.25589
						ATG4B	0.0350984	1.03901	0.140289	1.13492	0.954384											0.041993	1.35614	0.156378	1.55548	1.1512
						BAG5	0.00556019	1.09049	0.0233392	1.12709	1.05449											0.119371	1.05598	0.0150692	1.11852	0.932961
						BIRC4	0.798083	1.02054	0.0375046	1.13418	0.924484											0.0193857	2.79068	2.42241e-05	0.848463	3.8839
						BRPF3	0.00491792	1.01524	0.0177174	1.15058	0.899166											0.030036	1.25459	0.0877323	1.30205	1.0978
						C17ORF85	0.00296331	1.09434	0.0100024	1.18226	1.01604											0.041558	1.18352	0.111368	1.13214	1.23102
						C20orf11	0.0190758	1.05557	0.121057	1.12508	0.992487											0.594487	1.06067	0.0311497	1.95551	0.342238
						CDC34	0.00477797	1.08583	0.0137491	1.11236	1.05979											0.477456	1.2081	0.0399123	0.669159	0.812433
						DKKL1	0.240863	1.03069	0.0470792	1.02218	1.0378											0.0164909	1.21348	0.0579347	1.04713	1.48179
						FBXO42	0.86609	1.03078	0.0432706	1.21267	0.883289											0.0101087	1.6361	0.000673022	1.06579	2.10855
						GATA1	0.0488137	1.0182	0.197076	1.0173	1.01807											0.0151759	1.30818	0.105337	1.20426	1.33864
						GATAD1	0.0121379	1.13997	0.0649696	1.16442	1.11462											0.433251	1.07354	0.00856361	0.97452	1.07723
						HOXD9	0.0258199	1.02318	0.202057	1.02907	1.01757											0.00232753	1.97931	0.00470974	1.34727	2.52157
						HYAL4	0.0488524	1.09075	0.0950189	1.15734	1.03112											0.131193	1.65419	0.033886	1.23422	1.96462
						LMNB2	0.00687365	1.08685	0.0105759	1.06881	1.1017											0.0949202	1.46538	0.0400648	1.31748	1.43709
						MARK2	0.00450264	1.06385	0.00598711	1.07968	1.04963											0.00621975	2.08083	0.000152937	1.16337	2.58026
						P2RY10	0.008765	1.13319	0.00831628	1.13646	1.13791						0.0240742	1.46271	0.0442397	1.25125	1.57014
						PCTK2	0.0435524	1.07518	0.0176554	1.08115	1.07339											0.0280071	1.27064	0.0749092	1.35467	1.24089
						PEX19	0.00722946	1.14329	0.0240729	1.26036	1.03925											0.0629685	1.53673	0.00394796	2.61414	0.595583
						PLLP	0.0474643	1.20752	0.0682352	1.40396	1.04515											0.0161591	1.33653	0.0850701	1.16356	1.44624
						POU6F1	0.0368835	1.15438	0.237298	1.2024	1.10887											0.138987	1.05755	0.038765	1.04241	1.05058
						PPP4R2	0.0806757	1.08073	0.0189117	1.14964	1.02077											0.0276773	1.10767	0.192451	1.17821	0.975664
						PRPF39	0.00217824	1.05322	0.00820167	1.05429	1.05211											0.0340148	1.06896	0.104445	0.934341	1.16703
						RARG	0.0240617	1.14216	0.0214396	1.29215	1.01445											0.00525229	1.59216	0.00112524	2.49538	0.746495
						RBM39	0.0167295	1.09066	0.013467	1.11188	1.07288											0.00325456	1.31392	0.00442798	1.82281	0.802232
						RIF1	0.0110546	1.15526	0.0309999	1.07917	1.23192											0.0299199	1.14953	0.00491191	2.4065	0.286401
						SFRS2B	0.0486591	1.03271	0.153507	1.06142	1.00447											0.00657556	1.12928	0.0121939	1.52226	0.717125
						SH2B3	0.000758902	1.09058	0.000219161	1.10568	1.07336											0.0363324	1.22384	0.0513325	1.61946	0.807097
						ST14	0.0164589	1.02528	0.00270339	1.00101	1.04994											0.0467009	2.51747	0.0136216	3.76459	1.28238
						TTC4	0.0127223	1.05986	0.0519344	1.05194	1.06819											0.0190549	1.41149	0.121512	1.42763	1.38805
						UNC50	0.00251017	1.13884	0.000788121	1.18225	1.10421											0.015615	1.47353	0.00629154	1.20769	1.67894
						USP7	0.0483468	1.0546	0.258285	1.02964	1.07887											0.0142491	1.50273	0.0517433	1.44549	1.41475
						WNT11	0.00334858	1.28328	0.00676485	1.09153	1.50536											0.0265677	1.21121	0.108432	1.48014	0.935795
PDE4D	rs1120303	Associated	7	7	Increased	AHR	0.349329	1.22099	0.0108618	0.964384	1.28256											0.00161327	5.02098	0.0149464	4.70417	5.67763
						B3GNT3	0.0803497	1.0988	0.0222723	0.959279	1.10479											0.0184205	1.16065	0.0390871	1.17593	1.12432
						HSPA2	0.0332861	1.21303	0.123906	1.04188	1.2239											0.0119172	1.6155	0.0635571	1.59365	1.73869
						RSAD2	0.265512	1.05834	0.0199064	0.94385	1.09438											0.0236436	1.20578	0.123083	1.18827	1.24169
						SLTM	0.0456363	1.3978	0.0218197	0.931043	1.43641											0.0368493	1.16586	0.0391507	1.24642	1.03251
						ZNF571	0.0927469	1.11833	0.022331	1.10415	1.13517											0.0348699	1.17877	0.141146	1.15895	1.21539
						ZNF652	0.117342	1.38513	0.017013	0.913736	1.47505											0.0478099	1.17997	0.147031	1.26751	1.05431
italics; homozygotes for minor allele not available, therefore fold change calculated to heterozygotes
Haplotype*; Haplotype of rs2503166, rs583018 and rs526772
Haplotype#; Haplotype of rs4503327, rs2503222 and rs6588186
