# Supplementary material for: The DISC1 Pathway Modulates Expression of Neurodevelopmental, Synaptogenic and Sensory Perception Genes
Source: PLoS One. 2009 Mar 20;4(3):e4906. doi: 10.1371/journal.pone.0004906 (PMC2654149; doi:10.1371/journal.pone.0004906)
Supplement: Table S4 — Table to show the gene ontology terms that are significantly enriched in the gene lists for each variant and the four groupings of variants. (0.03 MB XLS) [file pone.0004906.s007.xls]

## Sheet: Table S4
Table S4. Table to show the gene ontology terms that are significantly enriched in the gene lists for each variant and the four groupings of variants.
Gene	Variant	Variant Type	Number of Genes	Gene Ontology Term	Number Obeserved	Number Expected	Number in GO terma	R value	p-value	Genes Involved
DISC1	rs1765778	cis	22	response to abiotic stimulus	2	0.11	55.785	18.18	0.0048221	CLOCK; PITPNM1
				response to radiation	2	0.07	35.4995	28.57	0.00212569	CLOCK; PITPNM1
				response to light stimulus	2	0.06	30.4282	33.33	0.00156304	CLOCK; PITPNM1
DISC1	rs1655297	cis	7	---	-	-	-	-	-	-
DISC1	rs1025526	cis	19	physiological response to stimulus	5	1.44	845.583	3.47	0.00944941	OCLM; FPR1; HLA-DQA1; NFATC4; WFS1
				peptide receptor activity	2	0.15	88.0816	13.33	0.00907458	TUBB3; FPR1
				peptide receptor activity\, G-protein coupled	2	0.15	88.0816	13.33	0.00907458	TUBB3; FPR1
DISC1	rs6541280	cis	19	sensory perception of mechanical stimulus	2	0.15	88.0816	13.33	0.00928392	WFS1; CD151
				sensory perception of sound	2	0.15	88.0816	13.33	0.00928392	WFS1; CD151
				guanyl nucleotide binding	3	0.35	205.524	8.57	0.00440069	TUBB3; PRKG2; MFHAS1
DISC1	rs3738398	cis	17	cell adhesion	4	0.67	439.717	5.97	0.00309776	F5; PCDHB14; FEZ1; CD151
				organismal physiological process	6	2.1	1378.22	2.86	0.00907593	F5; FCAR; PCDHB14; CRTAM; DYSF; CD151
				sulfuric ester hydrolase activity	2	0.01	6.56294	200	8.29377e-05	GALNS; ARSJ
DISC1	rs823167	cis	19	sensory perception of mechanical stimulus	2	0.15	88.0816	13.33	0.00928392	WFS1; CD151
				sensory perception of sound	2	0.15	88.0816	13.33	0.00928392	WFS1; CD151
DISC1	rs3738401	nsSNP	47	amine binding	2	0.13	30.8598	15.38	0.00714974	CHRNA5; PAH
				oxidoreductase activity\, acting on the aldehyde or oxo group of donors	2	0.12	28.486	16.67	0.00610952	ALDH1A3; ALDH1A2
				oxidoreductase activity\, acting on the aldehyde or oxo group of donors\, NAD or NADP as acceptor	2	0.08	18.9906	25	0.00307664	ALDH1A3; ALDH1A2
				3-chloroallyl aldehyde dehydrogenase activity	2	0.03	7.12149	66.67	0.000351163	ALDH1A3; ALDH1A2
				microtubule organizing center	3	0.18	42.7289	16.67	0.000767042	PPP4R2; MLF1; TUBD1
				centrosome	3	0.16	37.9813	18.75	0.000485585	PPP4R2; MLF1; TUBD1
				microtubule cytoskeleton	4	0.7	166.168	5.71	0.00494046	TUBB3; PPP4R2; MLF1; TUBD1
DISC1	rs6675281	nsSNP	19	---	-	-	-	-	-	-
DISC1	rs821616	nsSNP	18	guanyl nucleotide binding	3	0.39	241.735	7.69	0.00652911	EIF2S3; ARL15; RAB11B
				GTP binding	3	0.38	235.537	7.89	0.00579314	EIF2S3; ARL15; RAB11B
DISC1	Risk Model	associated	22	DNA repair	3	0.41	207.926	7.32	0.00756309	XRCC3; SMC1A; EEF1E1
				DNA damage response\, signal transduction	2	0.05	25.3568	40	0.00110538	SMC1A; EEF1E1
				spliceosome complex	2	0.14	70.9991	14.29	0.00859174	TADA2L; ZRSR2
NDE1	Haplotype	associated	36	actin cytoskeleton organization and biogenesis	3	0.41	127.066	7.32	0.00763801	AVIL; EPB41; ARHGAP6
				protein complex assembly	4	0.82	254.132	4.88	0.00839501	TXNL4A; DAG1; TRAF2; HIST1H2BM
				SH3/SH2 adaptor activity	2	0.15	46.4875	13.33	0.00977279	ARHGAP6; SHB
				actin cytoskeleton	4	0.6	185.95	6.67	0.00269806	AVIL; DAG1; EPB41; ARHGAP6
NDE1	rs4781678	associated	39	circulation	3	0.36	102.988	8.33	0.00515534	GCGR; RHAG; CACNA1H
				cytokine binding	3	0.27	77.2408	11.11	0.00231	IL18BP; CCR2; IL9R
				interleukin binding	2	0.12	34.3292	16.67	0.00594929	IL18BP; IL9R
				plasma membrane part	10	4.48	1281.62	2.23	0.0084393	CCR2; GPR23; HTR3A; IL9R; CD82; KCNN1; LIMA1; RAB13; RHAG; CACNA1H
				plasma membrane	13	5.3	1516.21	2.45	0.00076965	CDH5; CCR2; GCGR; GPR23; HTR3A; IL9R; CD82; KCNN1; LIMA1; RAB13; RHAG; ACTL6A; CACNA1H
NDE1	rs2242549	associated	29	intrinsic to membrane	13	6.9	2654.6	1.88	0.00656022	SLC19A2; CLCN1; FCER1G; NLGN4Y; B4GALT1; GRIA3; ORMDL2; KCNN1; BRWD2; PLSCR4; SLC5A1; ST3GAL5; CD7
				integral to membrane	13	6.88	2646.9	1.89	0.00639554	SLC19A2; CLCN1; FCER1G; NLGN4Y; B4GALT1; GRIA3; ORMDL2; KCNN1; BRWD2; PLSCR4; SLC5A1; ST3GAL5; CD7
NDE1	rs881803	associated	52	sensory perception of mechanical stimulus	3	0.42	90.1142	7.14	0.00846869	TRIOBP; GJB3; SOX10
				sensory perception of sound	3	0.42	90.1142	7.14	0.00846869	TRIOBP; GJB3; SOX10
				intracellular membrane-bound organelle	25	17.2	3690.39	1.45	0.00696782	ERP29; TRIOBP; AP1GBP1; FKBP2; DZIP1; ARSG; FUT2; B4GALT1; HIST1H2AE; HOXD11; NDUFA4; NOX4; INOC1; NEIL3; PSMC1; SOX10; SYN2; TCEAL4; USP5; ZRSR2; SUPT3H; FOXH1; PHOX2B; RECQL4; SNX17
				membrane-bound organelle	25	17.21	3692.54	1.45	0.00703373	ERP29; TRIOBP; AP1GBP1; FKBP2; DZIP1; ARSG; FUT2; B4GALT1; HIST1H2AE; HOXD11; NDUFA4; NOX4; INOC1; NEIL3; PSMC1; SOX10; SYN2; TCEAL4; USP5; ZRSR2; SUPT3H; FOXH1; PHOX2B; RECQL4; SNX17
NDE1	rs2075512	associated	18	negative regulation of transcription\, DNA-dependent	2	0.15	92.975	13.33	0.00907699	ZHX2; IRF8
				cellular defense response	2	0.1	61.9833	20	0.00461127	ITK; FAIM3
				DNA binding	6	2.01	1245.87	2.99	0.00870741	ZHX2; ZNF500; HOXD3; IRF8; ZNF140; HIST1H2BM
				transcription factor activity	5	1.01	626.032	4.95	0.0021423	ZHX2; ZNF500; HOXD3; IRF8; ZNF140
NDEL1	Haplotype	associated	20	Notch signaling pathway	2	0.05	27.8925	40	0.00108122	APP; NOTCH4
				vesicle-mediated transport	4	0.56	312.396	7.14	0.00201305	RABEPK; CD93; APP; CLINT1
				endocytosis	4	0.22	122.727	18.18	5.88871e-05	RABEPK; CD93; APP; CLINT1
				organismal physiological process	9	3.24	1807.43	2.78	0.00178288	DPP4; CD93; AIRE; IFNB1; APP; NOTCH4; SPG3A; PTGS1; ZAP70
				cell activation	3	0.22	122.727	13.64	0.00120272	CD93; IFNB1; ZAP70
				leukocyte activation	3	0.19	105.992	15.79	0.000787632	CD93; IFNB1; ZAP70
				immune system process	7	1.11	619.214	6.31	5.15198e-05	DPP4; CD93; AIRE; IFNB1; NOTCH4; SPG3A; ZAP70
				immune response	5	0.89	496.486	5.62	0.00140752	DPP4; AIRE; IFNB1; SPG3A; ZAP70
				response to virus	2	0.15	83.6775	13.33	0.00947042	IFNB1; POLA1
				carbohydrate binding	3	0.37	206.404	8.11	0.00570814	CD93; APP; POLA1
				iron ion binding	3	0.43	239.875	6.98	0.00865578	APP; CYB5R4; PTGS1
				protein heterodimerization activity	2	0.14	78.099	14.29	0.00897894	SDCBP2; NOTCH4
				cell surface	2	0.13	72.5205	15.38	0.0072872	APP; NOTCH4
NDEL1	rs17806986	associated	2	---	-	-	-	-	-	-
PDE4B	Haplotype*	associated	4	system development	2	0.1	278.925	20	0.00249172	DRP2; GAS7
				nervous system development	2	0.1	278.925	20	0.00243892	DRP2; GAS7
PDE4B	Haplotype#	associated	31	regulation of organismal physiological process	3	0.34	122.367	8.82	0.00443744	CYP2J2; NPTN; SERPING1
PDE4B	rs2503177	associated	14	purine nucleotide binding	5	1.36	1083.82	3.68	0.0065141	G3BP1; CDK6; ASCC3L1; PEBP1; UCK2
				adenyl nucleotide binding	5	1.14	908.499	4.39	0.00297752	G3BP1; CDK6; ASCC3L1; PEBP1; UCK2
				ATP binding	5	1.08	860.683	4.63	0.00231309	G3BP1; CDK6; ASCC3L1; PEBP1; UCK2
				helicase activity	2	0.1	79.6929	20	0.00400297	G3BP1; ASCC3L1
				ATP-dependent helicase activity	2	0.07	55.785	28.57	0.00201837	G3BP1; ASCC3L1
				nuclease activity	2	0.1	79.6929	20	0.00432293	G3BP1; ENDOGL1
				endonuclease activity	2	0.07	55.785	28.57	0.00209452	G3BP1; ENDOGL1
PDE4B	rs2503166	associated	13	---	-	-	-	-	-	-
PDE4B	rs7412571	associated	83	calcium-dependent cell-cell adhesion	2	0.11	14.7864	18.18	0.00518462	PCDHB13; PCDHB2
				cytokinesis	2	0.11	14.7864	18.18	0.00518462	SEPT2; SEPT4
				synapse organization and biogenesis	2	0.12	16.1306	16.67	0.00665284	PCDHB13; PCDHB2
				synaptogenesis	2	0.12	16.1306	16.67	0.00665284	PCDHB13; PCDHB2
				dipeptidase activity	2	0.05	6.72108	40	0.000877432	PEPD; SCRN1
PDE4D	Haplotype	associated	36	---	-	-	-	-	-	-
PDE4D	rs13190249	associated	7	response to chemical stimulus	2	0.16	255.017	12.5	0.0089572	AHR; HSPA2
DISC1	cis	overlaps	20	sensory perception of light stimulus	3	0.27	150.62	11.11	0.00214934	OCLM; WFS1; CD151
				visual perception	3	0.27	150.62	11.11	0.00214934	OCLM; WFS1; CD151
				hydrolase activity\, acting on ester bonds	4	0.76	423.966	5.26	0.00555609	GALNS; CTAGE5; PTPRE; ARSJ
				sulfuric ester hydrolase activity	2	0.02	11.157	100	0.0001579	GALNS; ARS
				serine-type endopeptidase inhibitor activity	2	0.11	61.3635	18.18	0.00513116	SPINK4; TMEM59
NDE1	All	overlaps	17	cytokine binding	2	0.15	98.4441	13.33	0.00924951	IL18BP; IL9R
				interleukin binding	2	0.06	39.3776	33.33	0.00181657	IL18BP; IL9R
DISC1 Pathway	All associated	overlaps	5	organelle organization and biogenesis	2	0.14	312.396	14.29	0.00512449	LIMA1; SMC1A
				cytoskeleton organization and biogenesis	2	0.06	133.884	33.33	0.00101365	LIMA1; SMC1A
DISC1 Pathway	All	overlaps	17	organelle organization and biogenesis	4	0.79	518.472	5.06	0.00572789	TUBB3; TIMM8A; LIMA1; SMC1A
				cytoskeleton organization and biogenesis	3	0.35	229.703	8.57	0.00437545	TUBB3; LIMA1; SMC1A
				microtubule-based process	2	0.12	78.7553	16.67	0.00591347	TUBB3; SMC1A
				response to abiotic stimulus	2	0.08	52.5035	25	0.00257184	TACR1; SMC1A
				neurotransmitter binding	2	0.1	65.6294	20	0.0044886	CHRNA5; TACR1
				neurotransmitter receptor activity	2	0.1	65.6294	20	0.00412949	CHRNA5; TACR1
				peptide receptor activity	2	0.12	78.7553	16.67	0.0064933	TUBB3; TACR1
				peptide receptor activity\, G-protein coupled	2	0.12	78.7553	16.67	0.0064933	TUBB3; TACR1
				transmembrane receptor activity	4	0.81	531.598	4.94	0.00643468	TUBB3; CHRNA5; P2RY10; TACR1
				G-protein coupled receptor activity	3	0.41	269.081	7.32	0.00676217	TUBB3; P2RY10; TACR1
				rhodopsin-like receptor activity	3	0.33	216.577	9.09	0.00367603	TUBB3; P2RY10; TACR1
				cytoskeletal part	3	0.44	288.769	6.82	0.00810595	TUBB3; PPP4R2; LIMA1
				intracellular organelle part	6	2	1312.59	3	0.00715418	TUBB3; PPP4R2; TIMM8A; LIMA1; ZRSR2; SMC1A
				organelle part	6	2	1312.59	3	0.00715418	TUBB3; PPP4R2; TIMM8A; LIMA1; ZRSR2; SMC1A
Haplotype*; Haplotype of rs2503166, rs583018 and rs526772
Haplotype#; Haplotype of rs4503327, rs2503222 and rs6588186
a Calculated based on GOTM calculation of expected values where: expected number of observations = (number of gene observations / number of genes in reference gene list)number of genes in GO term; variations in same GO term likely to be due to observed number being rounded to two decimal places by GOTM
